# Supplementary material for: Distal axotomy enhances retrograde presynaptic excitability onto injured pyramidal neurons via trans-synaptic signaling
Source: PubMed Central journal article supplement (PMC5607003; doi:10.1038/s41467-017-00652-y), 2017-09-20
Supplement: 41467_2017_652_MOESM1_ESM.pdf [file 41467_2017_652_MOESM1_ESM.pdf]

### **Description of Supplementary Files**

File Name: Supplementary Information

Description: Supplementary Figures, and Supplementary Tables

File Name: Peer Review File

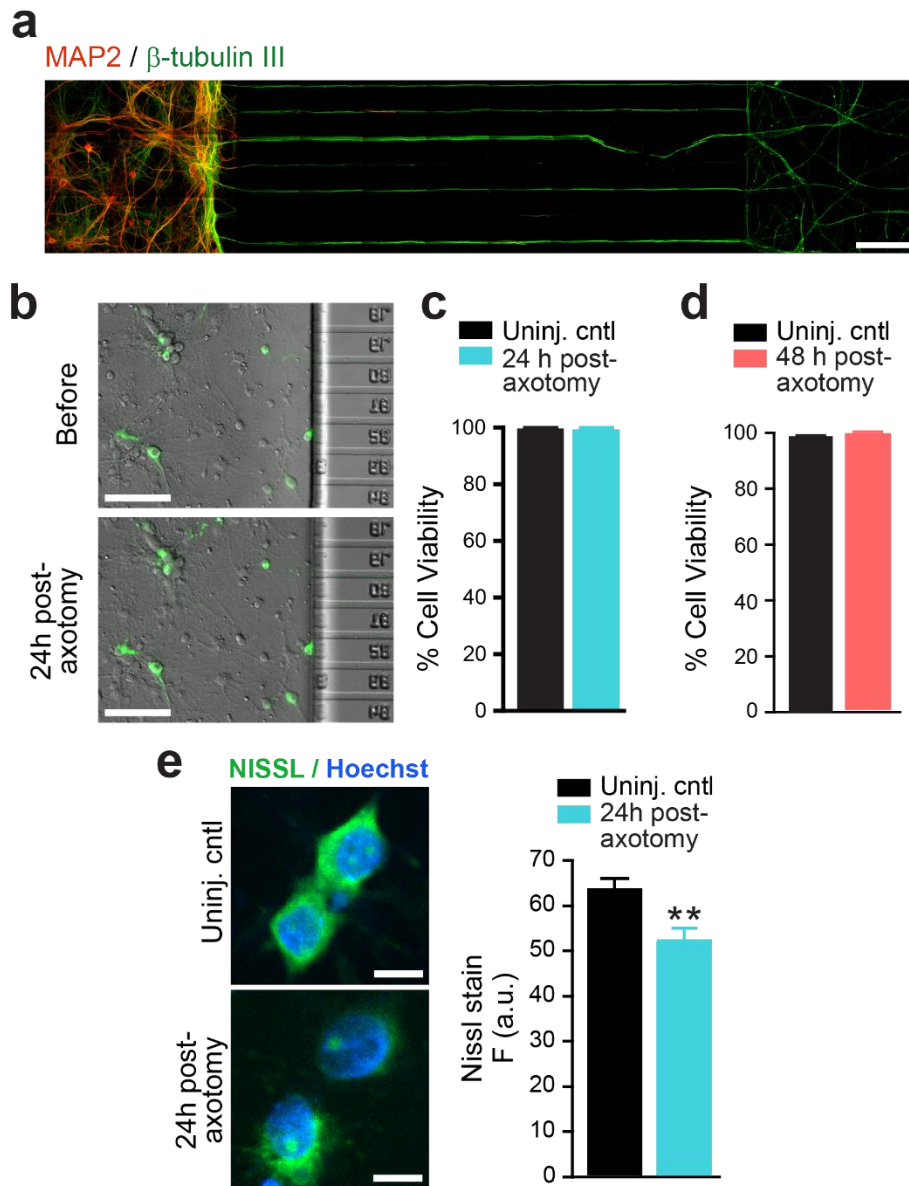

**Supplementary Figure 1:** Distal axotomy of pyramidal neurons induces dissolution of Nissl substance without affecting cell viability. (a) Images of cultured neurons within 900  $\mu$ m barrier microfluidic chambers immunostained for the dendritic marker, MAP2, and neuron-specific,  $\beta$ -tubulin III. MAP2 staining is restricted to the somatodendritic compartment. The microfluidic chamber was removed during immunostaining to enable staining of axons and dendrites within the microgroove region. The removal of the chamber caused occasional shifting of axons as observed in this micrograph. (b)

Neurons, retrograde-labeled with an Alexa 488-conjugated cholera toxin, show no observable change in appearance following injury. Scale bar, 100  $\mu\text{m}$ . (c) Cell viability at 24 h post-axotomy (control, n=830 neurons; axotomy, n=686 neurons). Results are from one of three experiments showing the same trend. (d) Cell viability at 48 h post-axotomy. *Control*: n= 560 neurons; 2 chambers per condition. *Axotomy*, n= 417 neurons; 2 chambers per condition. Results are from one of three experiments showing the same trend. (e) Nissl level decreases in the cell body of injured neurons identified using the retrograde tracer, Alexa 488-conjugated cholera toxin, at 24 h post-axotomy. *control*: n=19 neurons; 2 chambers per condition. *Axotomy*: n=18 neurons; 2 chambers per condition. Scale bar, 10  $\mu\text{m}$ . Two-tailed t-test, \*\*  $p < 0.01$ . Error bars, s.e.m.

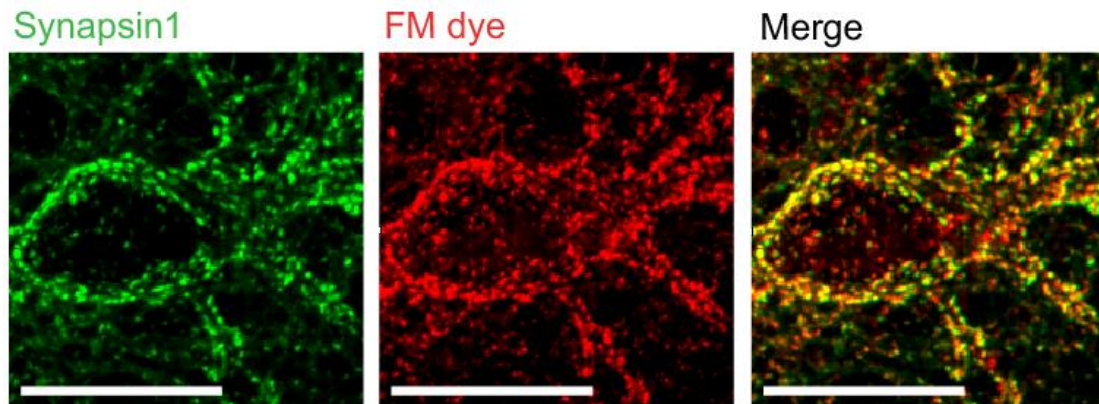

**Supplementary Figure 2:** FM puncta colocalize with synapsin1 immunolabeling. Representative images of neurons loaded with FM dye (FM4-64FX; red) into recycling synaptic vesicles and counterstained with synapsin1 antibody (green). Merge image indicate that FM labeled terminals are co-labeled with synapsin1. Pearson's correlation coefficient,  $r=0.75$ . About 93% of FM labeled terminal expressed synapsin1 labeling. Results are from one of three experiments showing the same trend. Scale bars, 20  $\mu\text{m}$ .

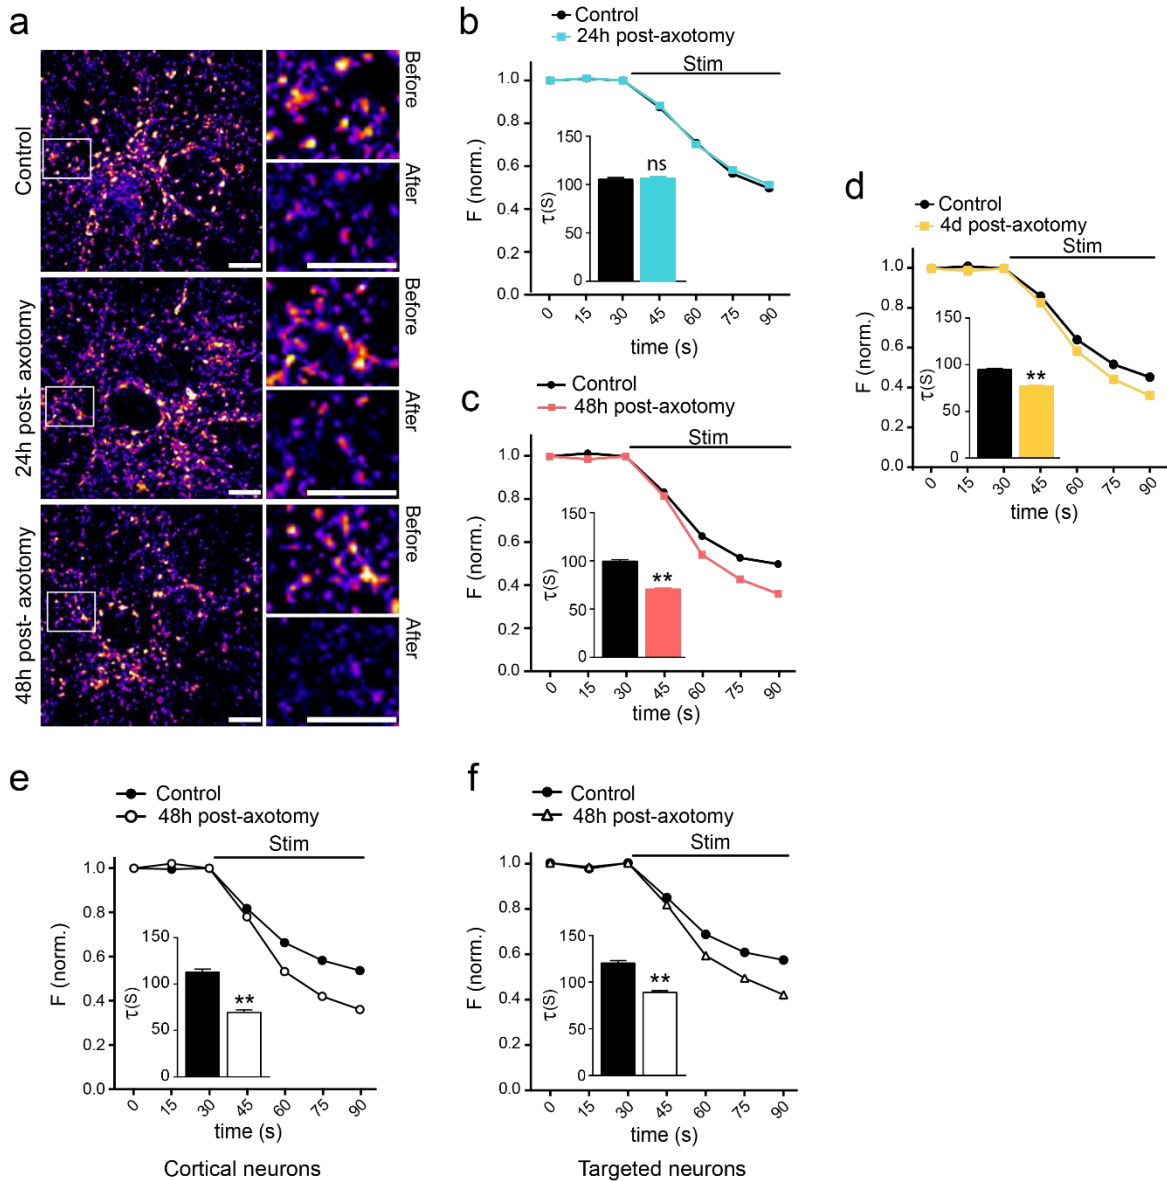

**Supplementary Figure 3:** FM unloading curves for (1) somatodendritic compartments, near the microgrooves of microfluidic chambers without retrograde labeling, and (2) cortical and targeted neuron populations subjected to axotomy. (a) Images within the somatodendritic compartment of microfluidic chambers showing presynaptic terminals labeled with FM5-95 (FM puncta). Color look up table 'Fire'. Enlarged outlined region shows FM puncta before and after field stimulation. Scale bars, 10  $\mu$ m. (b) FM unloading curves 24 h post-axotomy (control, n=1,972 puncta; axotomy, n=1,944 puncta; 6 chambers for each condition). Inset shows mean time constant of unloading puncta. (c) 48 h

post-axotomy (control, n=2,368 puncta; axotomy, n=2,939 puncta; 6 chambers for each condition). (d) 4 d post-axotomy (control, n=3,438 puncta; axotomy, n=3,168 puncta; 6 chambers for each condition). (e) Cortical neurons show consistent FM unloading patterns as hippocampal neurons following axotomy (control, n=762 puncta; axotomy, n=482 puncta; 7 chambers for each condition). (f) Cultures with target neurons within the axonal compartment that are axotomized show consistent FM unloading patterns as axotomized untargeted axons (control, n=1,237 puncta; axotomy, n=1,602 puncta; 6 chambers for each condition). Data sets include 3 experiments. Error bars, s.e.m. \*\*p< 0.0001.

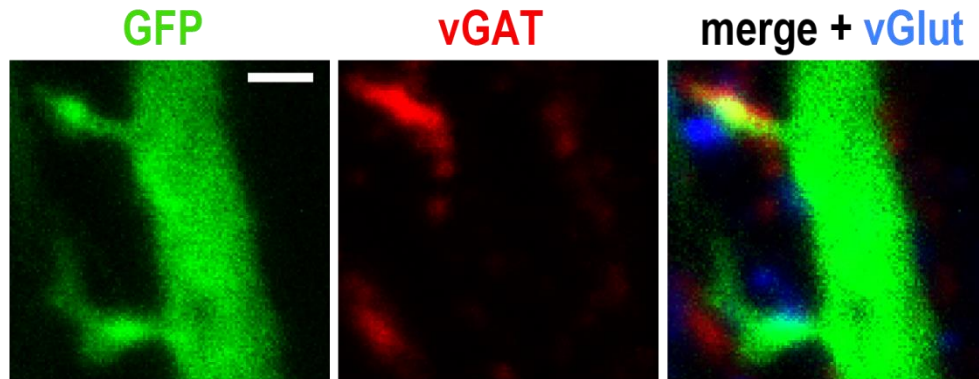

**Supplementary Figure 4:** Fluorescence micrograph of a dually innervated dendritic spine receiving both excitatory and inhibitory inputs. An example of a spine receiving dual innervation from both inhibitory (vGAT-positive, red) and excitatory (vGlut-positive, blue) presynaptic terminals. The GFP-filled dendritic segment was retrograde labeled within microfluidic chambers using a modified eGFP rabies virus. Roughly ~10% of spines are dually innervated (i.e., inhibited spines) in microfluidic cultures. Scale, 1  $\mu\text{m}$ .

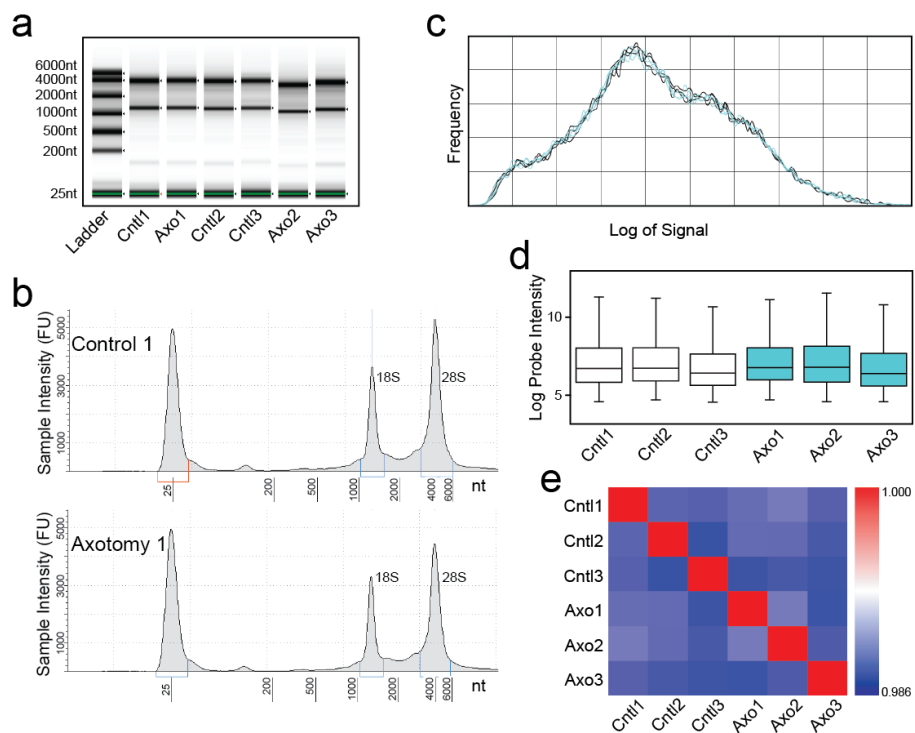

**Supplementary Figure 5:** RNA quality assessment and verification of microarray quality controls. **(a)** Image of ScreenTape gel from TapeStation RNA quality assessment of triplicate control (Cntl) and axotomy (Axo) RNA samples, standard ladder is included. **(b)** Fluorescence intensity traces of ScreenTape lanes from Control1 and Axotomy1 samples plotted versus nucleotide length as determined by the ladder. Clearly defined 18S and 28S bands in the gel (*a*) and peaks in the traces (*b*) indicate high quality RNA samples. **(c)** Histogram of microarray probe cell intensity following RMA analysis, plotted as frequency of signal versus signal intensity (log scale) for all control (black) and axotomy (blue) arrays. **(d)** Box-and-whiskers plot of the probe cell intensity (log scale) for each of the triplicate control (Cntl, white) and axotomy (Axo, blue) arrays following RMA analysis prior to normalization. **(e)** Pearson's correlation of normalized expression signal after analysis of triplicate control (Cntl) and axotomy (Axo) arrays. Indicator to the right demonstrates degree of correlation between samples.



**Supplementary Table 1:** Membrane properties of uninjured controls vs. axotomized neurons 48 h post-axotomy.

|                         | Uninjured control ( $\pm$ SEM) | Axotomy ( $\pm$ SEM) | p-value |
|-------------------------|--------------------------------|----------------------|---------|
| Sample Size (# neurons) | 17                             | 20                   |         |
| $C_m$ (pF)              | 51.9 $\pm$ 4.5                 | 57.0 $\pm$ 4.6       | 0.44    |
| $R_s$ (M $\Omega$ )     | 13.1 $\pm$ 0.8                 | 13.2 $\pm$ 1.0       | 0.90    |
| $R_m$ (M $\Omega$ )     | 715 $\pm$ 108                  | 661 $\pm$ 92         | 0.39    |
| Tau ( $\mu$ s)          | 281 $\pm$ 33                   | 331 $\pm$ 52         | 0.77    |

**Supplementary Table 2:** List of transcripts that were significantly changed 24 h after injury.

| Transcript Cluster ID | Injury Bi-weight Avg Signal (log2) | Control Bi-weight Avg Signal (log2) | Fold Change (linear) (Injury vs. Control) | Fold Change (log2) | ANOVA p-value (Injury vs. Control) | FDR p-value (Injury vs. Control) | Gene Symbol                                                                                                                                                                                                                                                           |
|-----------------------|------------------------------------|-------------------------------------|-------------------------------------------|--------------------|------------------------------------|----------------------------------|-----------------------------------------------------------------------------------------------------------------------------------------------------------------------------------------------------------------------------------------------------------------------|
| 17619431              | 3.75                               | 2.72                                | 2.03                                      | 1.0214797          | 0.028761                           | 0.999562                         | Olr272                                                                                                                                                                                                                                                                |
| 17610865              | 4.56                               | 3.72                                | 1.79                                      | 0.8399596          | 0.023334                           | 0.999562                         | RGD1560695                                                                                                                                                                                                                                                            |
| 17683217              | 3.97                               | 3.14                                | 1.77                                      | 0.8237494          | 0.001085                           | 0.999562                         | RGD1560186; RGD1561310; RPL37-PS1                                                                                                                                                                                                                                     |
| 17802851              | 6.15                               | 5.44                                | 1.64                                      | 0.7136958          | 0.026                              | 0.999562                         | LOC100359438                                                                                                                                                                                                                                                          |
| 17667757              | 3.85                               | 3.16                                | 1.61                                      | 0.6870607          | 0.012066                           | 0.999562                         | Gm6358                                                                                                                                                                                                                                                                |
| 17839177              | 7.25                               | 6.6                                 | 1.56                                      | 0.641546           | 0.044312                           | 0.999562                         | Kdelr3                                                                                                                                                                                                                                                                |
| 17826908              | 3.79                               | 3.15                                | 1.55                                      | 0.6322682          | 0.001538                           | 0.999562                         | Vom1r106                                                                                                                                                                                                                                                              |
| 17882823              | 7.39                               | 6.83                                | 1.48                                      | 0.5655972          | 0.021212                           | 0.999562                         | LOC688318; Cyp27b1; Chchd2; LOC684871; Fabp5; Lce1l; Lsm2; LOC100362916; LOC682812; LOC684372; LOC100366231; LOC682352; LOC100910788; LOC501317; LOC684892; LOC100909462; LOC689635; LOC100909409; LOC100911002; LOC100910163; LOC100911516; RGD1561986; rno-mir-3584 |
| 17882811              | 11.07                              | 10.53                               | 1.45                                      | 0.5360529          | 0.003929                           | 0.999562                         | LOC688318; Cyp27b1; Chchd2; LOC684871; Fabp5; Lce1l; Lsm2; LOC100362916; LOC682812; LOC684372; LOC100366231; LOC682352; LOC100910788; LOC501317; LOC684892; LOC100909462; LOC689635; LOC100909409; LOC100911002; LOC100910163; LOC100911516; RGD1561986; rno-mir-3584 |
| 17882813              | 11.07                              | 10.53                               | 1.45                                      | 0.5360529          | 0.003929                           | 0.999562                         | LOC688318; Cyp27b1; Chchd2; LOC684871; Fabp5; Lce1l; Lsm2; LOC100362916; LOC682812; LOC684372; LOC100366231; LOC682352; LOC100910788; LOC501317; LOC684892; LOC100909462; LOC689635; LOC100909409; LOC100911002; LOC100910163; LOC100911516; RGD1561986; rno-mir-3584 |
| 17882815              | 11.07                              | 10.53                               | 1.45                                      | 0.5360529          | 0.003929                           | 0.999562                         | LOC688318; Cyp27b1; Chchd2; LOC684871; Fabp5; Lce1l; Lsm2; LOC100362916; LOC682812; LOC684372; LOC100366231; LOC682352; LOC100910788; LOC501317; LOC684892; LOC100909462; LOC689635; LOC100909409; LOC100911002; LOC100910163; LOC100911516; RGD1561986; rno-mir-3584 |
| 17851313              | 4.09                               | 3.55                                | 1.45                                      | 0.5360529          | 0.010949                           | 0.999562                         | Olr1303; LOC100910667                                                                                                                                                                                                                                                 |
| 17786439              | 4.36                               | 3.82                                | 1.45                                      | 0.5360529          | 0.023165                           | 0.999562                         | Olr824                                                                                                                                                                                                                                                                |
| 17622003              | 3.03                               | 2.51                                | 1.43                                      | 0.5160151          | 0.032091                           | 0.999562                         | Olr310                                                                                                                                                                                                                                                                |
| 17728535              | 5.52                               | 5.02                                | 1.41                                      | 0.4956952          | 0.010546                           | 0.999562                         | LOC683963                                                                                                                                                                                                                                                             |
| 17808683              | 10.16                              | 9.67                                | 1.41                                      | 0.4956952          | 0.036579                           | 0.999562                         | Jun                                                                                                                                                                                                                                                                   |
| 17789529              | 9.07                               | 8.57                                | 1.41                                      | 0.4956952          | 0.036746                           | 0.999562                         | Bet1                                                                                                                                                                                                                                                                  |
| 17732587              | 3.17                               | 2.67                                | 1.41                                      | 0.4956952          | 0.03922                            | 0.999562                         | Mir24-2; rno-mir-24-2                                                                                                                                                                                                                                                 |
| 17638641              | 6.95                               | 6.49                                | 1.38                                      | 0.4646683          | 0.016001                           | 0.999562                         | Ins2                                                                                                                                                                                                                                                                  |
| 17715387              | 4.56                               | 4.09                                | 1.38                                      | 0.4646683          | 0.036402                           | 0.999562                         | Serpnb1a                                                                                                                                                                                                                                                              |
| 17795789              | 3.99                               | 3.54                                | 1.37                                      | 0.4541759          | 0.009417                           | 0.999562                         | LOC100360076                                                                                                                                                                                                                                                          |
| 17856878              | 6.59                               | 6.15                                | 1.36                                      | 0.4436067          | 0.004841                           | 0.999562                         | Slc5a7                                                                                                                                                                                                                                                                |
| 17630022              | 6.71                               | 6.27                                | 1.36                                      | 0.4436067          | 0.012304                           | 0.999562                         | Ehd2                                                                                                                                                                                                                                                                  |
| 17763726              | 4.07                               | 3.62                                | 1.36                                      | 0.4436067          | 0.041519                           | 0.999562                         | Olr639; Olr636; LOC100910556; LOC100910858                                                                                                                                                                                                                            |
| 17882299              | 4.63                               | 4.2                                 | 1.35                                      | 0.4329594          | 0.012345                           | 0.999562                         | LOC688318; Cyp27b1; Chchd2; LOC684871; Fabp5; Lce1l; Lsm2; LOC100362916; LOC682812; LOC684372; LOC100366231; LOC682352; LOC100910788; LOC501317; LOC684892; LOC100909462; LOC689635; LOC100909409; LOC100911002; LOC100910163; LOC100911516; RGD1561986; rno-mir-3584 |
| 17774130              | 3.06                               | 2.63                                | 1.35                                      | 0.4329594          | 0.025611                           | 0.999562                         | Olr488                                                                                                                                                                                                                                                                |
| 17774142              | 4.52                               | 4.08                                | 1.35                                      | 0.4329594          | 0.025612                           | 0.999562                         | Olr499; LOC100912540                                                                                                                                                                                                                                                  |
| 17759755              | 6.55                               | 6.12                                | 1.35                                      | 0.4329594          | 0.045664                           | 0.999562                         | LOC679914                                                                                                                                                                                                                                                             |
| 17651601              | 4.75                               | 4.33                                | 1.34                                      | 0.422233           | 0.013397                           | 0.999562                         | Ccdc103                                                                                                                                                                                                                                                               |
| 17834373              | 4.82                               | 4.4                                 | 1.34                                      | 0.422233           | 0.01951                            | 0.999562                         | RGD1560291                                                                                                                                                                                                                                                            |
| 17881026              | 5.09                               | 4.67                                | 1.33                                      | 0.4114262          | 0.006697                           | 0.999562                         | LOC685095                                                                                                                                                                                                                                                             |
| 17621115              | 5.46                               | 5.06                                | 1.32                                      | 0.4005379          | 0.012195                           | 0.999562                         | Ilgax                                                                                                                                                                                                                                                                 |
| 17782183              | 5.27                               | 4.87                                | 1.32                                      | 0.4005379          | 0.017396                           | 0.999562                         | Ssmem1                                                                                                                                                                                                                                                                |
| 17658475              | 4.48                               | 4.08                                | 1.32                                      | 0.4005379          | 0.040871                           | 0.999562                         | Olr1470; Olr1481; LOC100909493                                                                                                                                                                                                                                        |
| 17658462              | 5.91                               | 5.52                                | 1.31                                      | 0.3895668          | 0.033909                           | 0.999562                         | Aspa                                                                                                                                                                                                                                                                  |

| Transcript Cluster ID | Injury Bi-weight Avg Signal (log2) | Control Bi-weight Avg Signal (log2) | Fold Change (linear) (Injury vs. Control) | Fold Change (log2) | ANOVA p-value (Injury vs. Control) | FDR p-value (Injury vs. Control) | Gene Symbol                                                                                                                                                                                                                                                           |
|-----------------------|------------------------------------|-------------------------------------|-------------------------------------------|--------------------|------------------------------------|----------------------------------|-----------------------------------------------------------------------------------------------------------------------------------------------------------------------------------------------------------------------------------------------------------------------|
| 17880923              | 2.96                               | 2.57                                | 1.31                                      | 0.3895668          | 0.04276                            | 0.999562                         | Olr1291; LOC100911015; LOC100911064                                                                                                                                                                                                                                   |
| 17777579              | 5.75                               | 5.37                                | 1.3                                       | 0.3785116          | 0.007331                           | 0.999562                         | Lrrn4                                                                                                                                                                                                                                                                 |
| 17612506              | 5.99                               | 5.62                                | 1.3                                       | 0.3785116          | 0.046768                           | 0.999562                         | Zfp52                                                                                                                                                                                                                                                                 |
| 17656475              | 5.11                               | 4.74                                | 1.29                                      | 0.3673711          | 0.021102                           | 0.999562                         | Olr1423                                                                                                                                                                                                                                                               |
| 17851236              | 4.18                               | 3.81                                | 1.29                                      | 0.3673711          | 0.021408                           | 0.999562                         | Olr1273; LOC100909937; LOC100909958; LOC100910086; LOC100910153; LOC100910227; LOC100910363; LOC100910548                                                                                                                                                             |
| 17666651              | 5.05                               | 4.69                                | 1.28                                      | 0.3561438          | 0.01255                            | 0.999562                         | Crygs                                                                                                                                                                                                                                                                 |
| 17882371              | 4.92                               | 4.57                                | 1.28                                      | 0.3561438          | 0.040726                           | 0.999562                         | LOC688318; Cyp27b1; Chchd2; LOC684871; Fabp5; Lce1l; Lsm2; LOC100362916; LOC682812; LOC684372; LOC100366231; LOC682352; LOC100910788; LOC501317; LOC684892; LOC100909462; LOC689635; LOC100909409; LOC100911002; LOC100910163; LOC100911516; RGD1561986; rno-mir-3584 |
| 17843379              | 4.72                               | 4.37                                | 1.28                                      | 0.3561438          | 0.049296                           | 0.999562                         | Olr1308                                                                                                                                                                                                                                                               |
| 17851371              | 3.68                               | 3.32                                | 1.28                                      | 0.3561438          | 0.049325                           | 0.999562                         | Olr1338                                                                                                                                                                                                                                                               |
| 17833268              | 5.34                               | 4.99                                | 1.27                                      | 0.3448285          | 0.038378                           | 0.999562                         | Olr1061                                                                                                                                                                                                                                                               |
| 17765578              | 4.62                               | 4.28                                | 1.27                                      | 0.3448285          | 0.047367                           | 0.999562                         | Duoxa2                                                                                                                                                                                                                                                                |
| 17783058              | 4.99                               | 4.65                                | 1.26                                      | 0.3334237          | 0.0119                             | 0.999562                         | Tas2r143; LOC100911989                                                                                                                                                                                                                                                |
| 17769970              | 8.27                               | 7.94                                | 1.26                                      | 0.3334237          | 0.025078                           | 0.999562                         | Spopl                                                                                                                                                                                                                                                                 |
| 17731468              | 6.72                               | 6.38                                | 1.26                                      | 0.3334237          | 0.049326                           | 0.999562                         | Tepp                                                                                                                                                                                                                                                                  |
| 17751632              | 4.93                               | 4.61                                | 1.25                                      | 0.3219281          | 0.000356                           | 0.876358                         | RGD1309170                                                                                                                                                                                                                                                            |
| 17752004              | 6.48                               | 6.16                                | 1.25                                      | 0.3219281          | 0.0021                             | 0.999562                         | Ifi44                                                                                                                                                                                                                                                                 |
| 17824773              | 3.34                               | 3.01                                | 1.25                                      | 0.3219281          | 0.003067                           | 0.999562                         | LOC100912547; LOC100911906                                                                                                                                                                                                                                            |
| 17692803              | 4.74                               | 4.42                                | 1.25                                      | 0.3219281          | 0.01544                            | 0.999562                         | Abcg3l1                                                                                                                                                                                                                                                               |
| 17850026              | 3                                  | 2.67                                | 1.25                                      | 0.3219281          | 0.017621                           | 0.999562                         | Olr1171                                                                                                                                                                                                                                                               |
| 17698136              | 6.3                                | 5.98                                | 1.25                                      | 0.3219281          | 0.029601                           | 0.999562                         | Rnase1l2                                                                                                                                                                                                                                                              |
| 17790903              | 4.77                               | 4.45                                | 1.24                                      | 0.3103401          | 0.006892                           | 0.999562                         | Clec5a                                                                                                                                                                                                                                                                |
| 17881701              | 7.3                                | 6.98                                | 1.24                                      | 0.3103401          | 0.017742                           | 0.999562                         | LOC688318; Cyp27b1; Chchd2; LOC684871; Fabp5; Lce1l; Lsm2; LOC100362916; LOC682812; LOC684372; LOC100366231; LOC682352; LOC100910788; LOC501317; LOC684892; LOC100909462; LOC689635; LOC100909409; LOC100911002; LOC100910163; LOC100911516; RGD1561986; rno-mir-3584 |
| 17782972              | 2.6                                | 2.3                                 | 1.24                                      | 0.3103401          | 0.03498                            | 0.999562                         | Sval1                                                                                                                                                                                                                                                                 |
| 17741173              | 10.23                              | 9.93                                | 1.24                                      | 0.3103401          | 0.047338                           | 0.999562                         | Sec22b                                                                                                                                                                                                                                                                |
| 17629376              | 3.6                                | 3.29                                | 1.23                                      | 0.2986583          | 0.002959                           | 0.999562                         | Olr7                                                                                                                                                                                                                                                                  |
| 17613026              | 6.66                               | 6.36                                | 1.23                                      | 0.2986583          | 0.011027                           | 0.999562                         | Isoc2b                                                                                                                                                                                                                                                                |
| 17800945              | 4.15                               | 3.86                                | 1.23                                      | 0.2986583          | 0.033823                           | 0.999562                         | Agbl4                                                                                                                                                                                                                                                                 |
| 17719288              | 3.12                               | 2.83                                | 1.23                                      | 0.2986583          | 0.038188                           | 0.999562                         | Prl3a1                                                                                                                                                                                                                                                                |
| 17686320              | 4.01                               | 3.71                                | 1.23                                      | 0.2986583          | 0.039704                           | 0.999562                         | LOC685351                                                                                                                                                                                                                                                             |
| 17797676              | 6.12                               | 5.82                                | 1.23                                      | 0.2986583          | 0.045257                           | 0.999562                         | RGD1562265                                                                                                                                                                                                                                                            |
| 17864319              | 5.7                                | 5.41                                | 1.22                                      | 0.2868811          | 0.005712                           | 0.999562                         | Mstn                                                                                                                                                                                                                                                                  |
| 17827861              | 8.45                               | 8.17                                | 1.22                                      | 0.2868811          | 0.032067                           | 0.999562                         | Kitlg                                                                                                                                                                                                                                                                 |
| 17881843              | 4.11                               | 3.83                                | 1.22                                      | 0.2868811          | 0.038699                           | 0.999562                         | LOC688318; Cyp27b1; Chchd2; LOC684871; Fabp5; Lce1l; Lsm2; LOC100362916; LOC682812; LOC684372; LOC100366231; LOC682352; LOC100910788; LOC501317; LOC684892; LOC100909462; LOC689635; LOC100909409; LOC100911002; LOC100910163; LOC100911516; RGD1561986; rno-mir-3584 |
| 17790891              | 4.83                               | 4.55                                | 1.22                                      | 0.2868811          | 0.03951                            | 0.999562                         | Prss37                                                                                                                                                                                                                                                                |
| 17868867              | 5.89                               | 5.6                                 | 1.22                                      | 0.2868811          | 0.041644                           | 0.999562                         | LOC291863                                                                                                                                                                                                                                                             |
| 17879514              | 6.4                                | 6.11                                | 1.22                                      | 0.2868811          | 0.042099                           | 0.999562                         | Mcf2                                                                                                                                                                                                                                                                  |
| 17876558              | 6.38                               | 6.1                                 | 1.22                                      | 0.2868811          | 0.048286                           | 0.999562                         | Zcchc16                                                                                                                                                                                                                                                               |
| 17730018              | 5.2                                | 4.92                                | 1.21                                      | 0.275007           | 0.010621                           | 0.999562                         | Tat                                                                                                                                                                                                                                                                   |
| 17685608              | 8.41                               | 8.14                                | 1.21                                      | 0.275007           | 0.012676                           | 0.999562                         | Soat1                                                                                                                                                                                                                                                                 |
| 17842112              | 6.61                               | 6.33                                | 1.21                                      | 0.275007           | 0.038701                           | 0.999562                         | Vstm5                                                                                                                                                                                                                                                                 |
| 17746221              | 7.25                               | 6.97                                | 1.21                                      | 0.275007           | 0.040677                           | 0.999562                         | Car3                                                                                                                                                                                                                                                                  |

| Transcript Cluster ID | Injury Bi-weight Avg Signal (log2) | Control Bi-weight Avg Signal (log2) | Fold Change (linear) (Injury vs. Control) | Fold Change (log2) | ANOVA p-value (Injury vs. Control) | FDR p-value (Injury vs. Control) | Gene Symbol                                                                                                                                                                                                                                                           |
|-----------------------|------------------------------------|-------------------------------------|-------------------------------------------|--------------------|------------------------------------|----------------------------------|-----------------------------------------------------------------------------------------------------------------------------------------------------------------------------------------------------------------------------------------------------------------------|
| 17881561              | 4                                  | 3.73                                | 1.2                                       | 0.2630344          | 0.004532                           | 0.999562                         | LOC688318; Cyp27b1; Chchd2; LOC684871; Fabp5; Lce1l; Lsm2; LOC100362916; LOC682812; LOC684372; LOC100366231; LOC682352; LOC100910788; LOC501317; LOC684892; LOC100909462; LOC689635; LOC100909409; LOC100911002; LOC100910163; LOC100911516; RGD1561986; rno-mir-3584 |
| 17744282              | 8.34                               | 8.08                                | 1.2                                       | 0.2630344          | 0.005696                           | 0.999562                         | Papd4                                                                                                                                                                                                                                                                 |
| 17822715              | 4.98                               | 4.72                                | 1.2                                       | 0.2630344          | 0.006277                           | 0.999562                         | Tex21                                                                                                                                                                                                                                                                 |
| 17762362              | 5.53                               | 5.26                                | 1.2                                       | 0.2630344          | 0.013101                           | 0.999562                         | LOC100361645                                                                                                                                                                                                                                                          |
| 17763581              | 3.81                               | 3.54                                | 1.2                                       | 0.2630344          | 0.013667                           | 0.999562                         | Olr456                                                                                                                                                                                                                                                                |
| 17779084              | 9.17                               | 8.9                                 | 1.2                                       | 0.2630344          | 0.019641                           | 0.999562                         | Oser1                                                                                                                                                                                                                                                                 |
| 17629411              | 8.24                               | 7.98                                | 1.2                                       | 0.2630344          | 0.02397                            | 0.999562                         | Zfp667                                                                                                                                                                                                                                                                |
| 17769590              | 9.36                               | 9.1                                 | 1.2                                       | 0.2630344          | 0.028284                           | 0.999562                         | Ogfr                                                                                                                                                                                                                                                                  |
| 17695584              | 5.58                               | 5.32                                | 1.2                                       | 0.2630344          | 0.034689                           | 0.999562                         | Nkx1-1                                                                                                                                                                                                                                                                |
| 17612006              | 9.34                               | 9.07                                | 1.2                                       | 0.2630344          | 0.036269                           | 0.999562                         | Rnaset2                                                                                                                                                                                                                                                               |
| 17626755              | 5.78                               | 5.52                                | 1.2                                       | 0.2630344          | 0.041758                           | 0.999562                         | Pnlip                                                                                                                                                                                                                                                                 |
| 17615156              | 6.91                               | 6.65                                | 1.2                                       | 0.2630344          | 0.042974                           | 0.999562                         | Zfp790; LOC100359464                                                                                                                                                                                                                                                  |
| 17812266              | 5.49                               | 5.22                                | 1.2                                       | 0.2630344          | 0.043536                           | 0.999562                         | RGD1306186                                                                                                                                                                                                                                                            |
| 17881080              | 9.85                               | 9.6                                 | 1.19                                      | 0.2509616          | 0.011961                           | 0.999562                         | LOC687711                                                                                                                                                                                                                                                             |
| 17723983              | 5.86                               | 5.61                                | 1.19                                      | 0.2509616          | 0.026427                           | 0.999562                         | Cidea                                                                                                                                                                                                                                                                 |
| 17877518              | 6.46                               | 6.21                                | 1.19                                      | 0.2509616          | 0.031518                           | 0.999562                         | Prrg1                                                                                                                                                                                                                                                                 |
| 17635086              | 6.79                               | 6.54                                | 1.19                                      | 0.2509616          | 0.037607                           | 0.999562                         | Acer3                                                                                                                                                                                                                                                                 |
| 17646510              | 8.74                               | 8.5                                 | 1.18                                      | 0.2387869          | 0.003092                           | 0.999562                         | Alkbh5                                                                                                                                                                                                                                                                |
| 17734361              | 6.77                               | 6.53                                | 1.18                                      | 0.2387869          | 0.004793                           | 0.999562                         | Acta1                                                                                                                                                                                                                                                                 |
| 17835237              | 7.06                               | 6.82                                | 1.18                                      | 0.2387869          | 0.0136                             | 0.999562                         | Elk3                                                                                                                                                                                                                                                                  |
| 17699671              | 6.19                               | 5.95                                | 1.18                                      | 0.2387869          | 0.016376                           | 0.999562                         | Scara5                                                                                                                                                                                                                                                                |
| 17792908              | 9.97                               | 9.73                                | 1.18                                      | 0.2387869          | 0.030267                           | 0.999562                         | Rpl22                                                                                                                                                                                                                                                                 |
| 17833304              | 8.18                               | 7.94                                | 1.18                                      | 0.2387869          | 0.031989                           | 0.999562                         | Zfp709l1                                                                                                                                                                                                                                                              |
| 17705822              | 4.99                               | 4.75                                | 1.18                                      | 0.2387869          | 0.032546                           | 0.999562                         | Hesx1                                                                                                                                                                                                                                                                 |
| 17788445              | 6.28                               | 6.05                                | 1.18                                      | 0.2387869          | 0.034422                           | 0.999562                         | Htr5a                                                                                                                                                                                                                                                                 |
| 17825419              | 7.6                                | 7.36                                | 1.18                                      | 0.2387869          | 0.038025                           | 0.999562                         | Cwf19l2                                                                                                                                                                                                                                                               |
| 17830560              | 7.08                               | 6.84                                | 1.18                                      | 0.2387869          | 0.041384                           | 0.999562                         | Micall1                                                                                                                                                                                                                                                               |
| 17881101              | 4.68                               | 4.45                                | 1.17                                      | 0.2265085          | 0.00648                            | 0.999562                         | Or51t1                                                                                                                                                                                                                                                                |
| 17745409              | 6.28                               | 6.06                                | 1.17                                      | 0.2265085          | 0.006963                           | 0.999562                         | Isl1                                                                                                                                                                                                                                                                  |
| 17685125              | 7.28                               | 7.05                                | 1.17                                      | 0.2265085          | 0.011292                           | 0.999562                         | Swt1                                                                                                                                                                                                                                                                  |
| 17619191              | 3.56                               | 3.34                                | 1.17                                      | 0.2265085          | 0.027472                           | 0.999562                         | LOC689730                                                                                                                                                                                                                                                             |
| 17752139              | 6.67                               | 6.45                                | 1.17                                      | 0.2265085          | 0.030748                           | 0.999562                         | Tyw3                                                                                                                                                                                                                                                                  |
| 17672845              | 8.79                               | 8.56                                | 1.17                                      | 0.2265085          | 0.034368                           | 0.999562                         | Prkrip1                                                                                                                                                                                                                                                               |
| 17615690              | 4.62                               | 4.39                                | 1.17                                      | 0.2265085          | 0.036049                           | 0.999562                         | LOC690284                                                                                                                                                                                                                                                             |
| 17830057              | 10.4                               | 10.17                               | 1.17                                      | 0.2265085          | 0.036966                           | 0.999562                         | Grina                                                                                                                                                                                                                                                                 |
| 17807952              | 6.65                               | 6.42                                | 1.17                                      | 0.2265085          | 0.049929                           | 0.999562                         | Hdh3                                                                                                                                                                                                                                                                  |
| 17612996              | 5.76                               | 5.54                                | 1.16                                      | 0.2141248          | 0.000694                           | 0.999562                         | Rfp14a                                                                                                                                                                                                                                                                |
| 17812245              | 9.98                               | 9.76                                | 1.16                                      | 0.2141248          | 0.004167                           | 0.999562                         | Pdpm                                                                                                                                                                                                                                                                  |
| 17811191              | 5.96                               | 5.74                                | 1.16                                      | 0.2141248          | 0.006542                           | 0.999562                         | Fgr                                                                                                                                                                                                                                                                   |
| 17873035              | 4.74                               | 4.53                                | 1.16                                      | 0.2141248          | 0.01315                            | 0.999562                         | Awat1                                                                                                                                                                                                                                                                 |
| 17862568              | 7.09                               | 6.88                                | 1.16                                      | 0.2141248          | 0.014239                           | 0.999562                         | Trem2                                                                                                                                                                                                                                                                 |
| 17881551              | 3.4                                | 3.19                                | 1.16                                      | 0.2141248          | 0.025286                           | 0.999562                         | LOC688318; Cyp27b1; Chchd2; LOC684871; Fabp5; Lce1l; Lsm2; LOC100362916; LOC682812; LOC684372; LOC100366231; LOC682352; LOC100910788; LOC501317; LOC684892; LOC100909462; LOC689635; LOC100909409; LOC100911002; LOC100910163; LOC100911516; RGD1561986; rno-mir-3584 |
| 17873568              | 4.11                               | 3.89                                | 1.16                                      | 0.2141248          | 0.025841                           | 0.999562                         | RGD1562871                                                                                                                                                                                                                                                            |
| 17669931              | 7.38                               | 7.17                                | 1.16                                      | 0.2141248          | 0.026271                           | 0.999562                         | Fam43a                                                                                                                                                                                                                                                                |
| 17641633              | 4.58                               | 4.37                                | 1.16                                      | 0.2141248          | 0.034034                           | 0.999562                         | RGD1565682                                                                                                                                                                                                                                                            |
| 17757261              | 5.85                               | 5.64                                | 1.16                                      | 0.2141248          | 0.039772                           | 0.999562                         | LOC100360640                                                                                                                                                                                                                                                          |
| 17766543              | 9.52                               | 9.3                                 | 1.16                                      | 0.2141248          | 0.040156                           | 0.999562                         | Cr1s1                                                                                                                                                                                                                                                                 |
| 17800346              | 6.25                               | 6.03                                | 1.16                                      | 0.2141248          | 0.04244                            | 0.999562                         | Oma1                                                                                                                                                                                                                                                                  |
| 17856971              | 6.61                               | 6.4                                 | 1.16                                      | 0.2141248          | 0.049934                           | 0.999562                         | RGD1559808                                                                                                                                                                                                                                                            |
| 17622676              | 8.69                               | 8.48                                | 1.15                                      | 0.2016339          | 0.012715                           | 0.999562                         | Cpt1a                                                                                                                                                                                                                                                                 |

| Transcript Cluster ID | Injury Bi-weight Avg Signal (log2) | Control Bi-weight Avg Signal (log2) | Fold Change (linear) (Injury vs. Control) | Fold Change (log2) | ANOVA p-value (Injury vs. Control) | FDR p-value (Injury vs. Control) | Gene Symbol                                                                                                                                                                                                                                                           |
|-----------------------|------------------------------------|-------------------------------------|-------------------------------------------|--------------------|------------------------------------|----------------------------------|-----------------------------------------------------------------------------------------------------------------------------------------------------------------------------------------------------------------------------------------------------------------------|
| 17881623              | 8.91                               | 8.71                                | 1.15                                      | 0.2016339          | 0.013024                           | 0.999562                         | LOC688318; Cyp27b1; Chchd2; LOC684871; Fabp5; Lce1l; Lsm2; LOC100362916; LOC682812; LOC684372; LOC100366231; LOC682352; LOC100910788; LOC501317; LOC684892; LOC100909462; LOC689635; LOC100909409; LOC100911002; LOC100910163; LOC100911516; RGD1561986; rno-mir-3584 |
| 17719453              | 5.63                               | 5.43                                | 1.15                                      | 0.2016339          | 0.020199                           | 0.999562                         | Cmah                                                                                                                                                                                                                                                                  |
| 17852165              | 6.12                               | 5.92                                | 1.15                                      | 0.2016339          | 0.020203                           | 0.999562                         | Htr3a                                                                                                                                                                                                                                                                 |
| 17823379              | 6.59                               | 6.38                                | 1.15                                      | 0.2016339          | 0.023366                           | 0.999562                         | Tgfb3                                                                                                                                                                                                                                                                 |
| 17812591              | 9.59                               | 9.38                                | 1.15                                      | 0.2016339          | 0.036955                           | 0.999562                         | Draxin                                                                                                                                                                                                                                                                |
| 17822377              | 5.73                               | 5.53                                | 1.15                                      | 0.2016339          | 0.048562                           | 0.999562                         | Cdk1l                                                                                                                                                                                                                                                                 |
| 17651411              | 6.37                               | 6.18                                | 1.14                                      | 0.1890338          | 0.000454                           | 0.897373                         | Rdm1                                                                                                                                                                                                                                                                  |
| 17735006              | 8.06                               | 7.87                                | 1.14                                      | 0.1890338          | 0.002392                           | 0.999562                         | Lysmd3                                                                                                                                                                                                                                                                |
| 17859309              | 7.63                               | 7.44                                | 1.14                                      | 0.1890338          | 0.005365                           | 0.999562                         | MGC94335                                                                                                                                                                                                                                                              |
| 17859543              | 6.22                               | 6.03                                | 1.14                                      | 0.1890338          | 0.022635                           | 0.999562                         | Casp8                                                                                                                                                                                                                                                                 |
| 17868542              | 6.83                               | 6.64                                | 1.14                                      | 0.1890338          | 0.02922                            | 0.999562                         | Steap3                                                                                                                                                                                                                                                                |
| 17619435              | 4.03                               | 3.84                                | 1.14                                      | 0.1890338          | 0.031578                           | 0.999562                         | Olr276                                                                                                                                                                                                                                                                |
| 17770946              | 7.34                               | 7.15                                | 1.14                                      | 0.1890338          | 0.034925                           | 0.999562                         | RGD1306233                                                                                                                                                                                                                                                            |
| 17740203              | 9.37                               | 9.19                                | 1.14                                      | 0.1890338          | 0.039086                           | 0.999562                         | LOC361985                                                                                                                                                                                                                                                             |
| 17817302              | 7.49                               | 7.3                                 | 1.14                                      | 0.1890338          | 0.043596                           | 0.999562                         | Acot2                                                                                                                                                                                                                                                                 |
| 17816111              | 7.57                               | 7.38                                | 1.14                                      | 0.1890338          | 0.045216                           | 0.999562                         | RGD1307621                                                                                                                                                                                                                                                            |
| 17780046              | 5.09                               | 4.9                                 | 1.14                                      | 0.1890338          | 0.046364                           | 0.999562                         | Bhlhe23                                                                                                                                                                                                                                                               |
| 17735614              | 8.46                               | 8.27                                | 1.14                                      | 0.1890338          | 0.048846                           | 0.999562                         | Dimt1                                                                                                                                                                                                                                                                 |
| 17656730              | 8.59                               | 8.41                                | 1.13                                      | 0.1763228          | 0.002642                           | 0.999562                         | Fln                                                                                                                                                                                                                                                                   |
| 17623100              | 8.26                               | 8.07                                | 1.13                                      | 0.1763228          | 0.007188                           | 0.999562                         | Eif1ad                                                                                                                                                                                                                                                                |
| 17710214              | 5.4                                | 5.23                                | 1.13                                      | 0.1763228          | 0.013499                           | 0.999562                         | Slc18a3                                                                                                                                                                                                                                                               |
| 17765048              | 5.69                               | 5.52                                | 1.13                                      | 0.1763228          | 0.013634                           | 0.999562                         | Spint1                                                                                                                                                                                                                                                                |
| 17680143              | 9                                  | 8.83                                | 1.13                                      | 0.1763228          | 0.016847                           | 0.999562                         | Ppp1r15b                                                                                                                                                                                                                                                              |
| 17679753              | 5.44                               | 5.26                                | 1.13                                      | 0.1763228          | 0.018811                           | 0.999562                         | Map3k19                                                                                                                                                                                                                                                               |
| 17865147              | 9.02                               | 8.84                                | 1.13                                      | 0.1763228          | 0.02085                            | 0.999562                         | Acadl                                                                                                                                                                                                                                                                 |
| 17882105              | 6.43                               | 6.26                                | 1.13                                      | 0.1763228          | 0.028186                           | 0.999562                         | LOC688318; Cyp27b1; Chchd2; LOC684871; Fabp5; Lce1l; Lsm2; LOC100362916; LOC682812; LOC684372; LOC100366231; LOC682352; LOC100910788; LOC501317; LOC684892; LOC100909462; LOC689635; LOC100909409; LOC100911002; LOC100910163; LOC100911516; RGD1561986; rno-mir-3584 |
| 17714388              | 6.2                                | 6.03                                | 1.13                                      | 0.1763228          | 0.031397                           | 0.999562                         | Dok3                                                                                                                                                                                                                                                                  |
| 17766437              | 7.38                               | 7.21                                | 1.13                                      | 0.1763228          | 0.035882                           | 0.999562                         | Mavs                                                                                                                                                                                                                                                                  |
| 17880424              | 9.62                               | 9.44                                | 1.13                                      | 0.1763228          | 0.035967                           | 0.999562                         | Dmtf1; LOC681224                                                                                                                                                                                                                                                      |
| 17649180              | 6.95                               | 6.77                                | 1.13                                      | 0.1763228          | 0.037411                           | 0.999562                         | Mir423; rno-mir-423                                                                                                                                                                                                                                                   |
| 17722342              | 8.99                               | 8.82                                | 1.13                                      | 0.1763228          | 0.038532                           | 0.999562                         | Fam53c                                                                                                                                                                                                                                                                |
| 17792516              | 6.76                               | 6.59                                | 1.13                                      | 0.1763228          | 0.046155                           | 0.999562                         | Hk2                                                                                                                                                                                                                                                                   |
| 17870547              | 5.85                               | 5.67                                | 1.13                                      | 0.1763228          | 0.049267                           | 0.999562                         | Rhox2                                                                                                                                                                                                                                                                 |
| 17650204              | 8.19                               | 8.03                                | 1.12                                      | 0.1634987          | 0.000706                           | 0.999562                         | Cox11                                                                                                                                                                                                                                                                 |
| 17669356              | 9.33                               | 9.16                                | 1.12                                      | 0.1634987          | 0.001248                           | 0.999562                         | Kpna1                                                                                                                                                                                                                                                                 |
| 17823218              | 10.45                              | 10.29                               | 1.12                                      | 0.1634987          | 0.00742                            | 0.999562                         | Npc2                                                                                                                                                                                                                                                                  |
| 17749936              | 7.93                               | 7.76                                | 1.12                                      | 0.1634987          | 0.008305                           | 0.999562                         | Ptgfrn                                                                                                                                                                                                                                                                |
| 17870502              | 7.8                                | 7.64                                | 1.12                                      | 0.1634987          | 0.013967                           | 0.999562                         | Tmem255a                                                                                                                                                                                                                                                              |
| 17860426              | 8.27                               | 8.11                                | 1.12                                      | 0.1634987          | 0.018721                           | 0.999562                         | Plcd4                                                                                                                                                                                                                                                                 |
| 17851854              | 10.39                              | 10.23                               | 1.12                                      | 0.1634987          | 0.021625                           | 0.999562                         | Arcn1                                                                                                                                                                                                                                                                 |
| 17616249              | 7.3                                | 7.13                                | 1.12                                      | 0.1634987          | 0.028126                           | 0.999562                         | Tead2                                                                                                                                                                                                                                                                 |
| 17658885              | 5.77                               | 5.6                                 | 1.12                                      | 0.1634987          | 0.028698                           | 0.999562                         | Proca1                                                                                                                                                                                                                                                                |
| 17616399              | 7.77                               | 7.61                                | 1.12                                      | 0.1634987          | 0.028777                           | 0.999562                         | Bcat2                                                                                                                                                                                                                                                                 |
| 17847108              | 6.92                               | 6.76                                | 1.12                                      | 0.1634987          | 0.029366                           | 0.999562                         | Acad11                                                                                                                                                                                                                                                                |
| 17717629              | 9.7                                | 9.54                                | 1.12                                      | 0.1634987          | 0.029827                           | 0.999562                         | Nsun2                                                                                                                                                                                                                                                                 |
| 17817610              | 5.83                               | 5.66                                | 1.12                                      | 0.1634987          | 0.031412                           | 0.999562                         | Esrrb                                                                                                                                                                                                                                                                 |
| 17673751              | 5.58                               | 5.42                                | 1.12                                      | 0.1634987          | 0.032506                           | 0.999562                         | Gpr81                                                                                                                                                                                                                                                                 |
| 17873000              | 6.88                               | 6.71                                | 1.12                                      | 0.1634987          | 0.03444                            | 0.999562                         | Fam155b                                                                                                                                                                                                                                                               |
| 17635008              | 8.05                               | 7.89                                | 1.12                                      | 0.1634987          | 0.038878                           | 0.999562                         | Aqp11                                                                                                                                                                                                                                                                 |
| 17783073              | 5.02                               | 4.85                                | 1.12                                      | 0.1634987          | 0.040603                           | 0.999562                         | Olr809                                                                                                                                                                                                                                                                |

| Transcript Cluster ID | Injury Bi-weight Avg Signal (log2) | Control Bi-weight Avg Signal (log2) | Fold Change (linear) (Injury vs. Control) | Fold Change (log2) | ANOVA p-value (Injury vs. Control) | FDR p-value (Injury vs. Control) | Gene Symbol                                                                                                                                                                                                                                                           |
|-----------------------|------------------------------------|-------------------------------------|-------------------------------------------|--------------------|------------------------------------|----------------------------------|-----------------------------------------------------------------------------------------------------------------------------------------------------------------------------------------------------------------------------------------------------------------------|
| 17882091              | 7.05                               | 6.89                                | 1.12                                      | 0.1634987          | 0.044003                           | 0.999562                         | LOC688318; Cyp27b1; Chchd2; LOC684871; Fabp5; Lce1l; Lsm2; LOC100362916; LOC682812; LOC684372; LOC100366231; LOC682352; LOC100910788; LOC501317; LOC684892; LOC100909462; LOC689635; LOC100909409; LOC100911002; LOC100910163; LOC100911516; RGD1561986; rno-mir-3584 |
| 17805564              | 8.95                               | 8.79                                | 1.12                                      | 0.1634987          | 0.047511                           | 0.999562                         | Tcea1; LOC498453                                                                                                                                                                                                                                                      |
| 17872966              | 9.37                               | 9.2                                 | 1.12                                      | 0.1634987          | 0.047722                           | 0.999562                         | Yipf6                                                                                                                                                                                                                                                                 |
| 17718585              | 8.78                               | 8.63                                | 1.11                                      | 0.1505597          | 0.000137                           | 0.832906                         | LOC100911018                                                                                                                                                                                                                                                          |
| 17876823              | 9.25                               | 9.1                                 | 1.11                                      | 0.1505597          | 0.00031                            | 0.876358                         | Tsr2                                                                                                                                                                                                                                                                  |
| 17636538              | 10.9                               | 10.74                               | 1.11                                      | 0.1505597          | 0.001665                           | 0.999562                         | Rps15a; LOC691065                                                                                                                                                                                                                                                     |
| 17678672              | 9.26                               | 9.11                                | 1.11                                      | 0.1505597          | 0.002356                           | 0.999562                         | Triap1; LOC100910137                                                                                                                                                                                                                                                  |
| 17785409              | 6                                  | 5.85                                | 1.11                                      | 0.1505597          | 0.002698                           | 0.999562                         | LOC685964                                                                                                                                                                                                                                                             |
| 17775350              | 5.37                               | 5.22                                | 1.11                                      | 0.1505597          | 0.007774                           | 0.999562                         | Chrm5                                                                                                                                                                                                                                                                 |
| 17864008              | 9.78                               | 9.64                                | 1.11                                      | 0.1505597          | 0.015782                           | 0.999562                         | Txnac9                                                                                                                                                                                                                                                                |
| 17809602              | 8.82                               | 8.67                                | 1.11                                      | 0.1505597          | 0.030173                           | 0.999562                         | Urod                                                                                                                                                                                                                                                                  |
| 17821879              | 7.69                               | 7.54                                | 1.11                                      | 0.1505597          | 0.033215                           | 0.999562                         | Egln3                                                                                                                                                                                                                                                                 |
| 17716240              | 10.66                              | 10.51                               | 1.11                                      | 0.1505597          | 0.035005                           | 0.999562                         | Rab18                                                                                                                                                                                                                                                                 |
| 17695236              | 6.54                               | 6.38                                | 1.11                                      | 0.1505597          | 0.036972                           | 0.999562                         | Hmx1                                                                                                                                                                                                                                                                  |
| 17618226              | 5.9                                | 5.75                                | 1.11                                      | 0.1505597          | 0.038931                           | 0.999562                         | Ccdc89                                                                                                                                                                                                                                                                |
| 17785641              | 10.74                              | 10.59                               | 1.11                                      | 0.1505597          | 0.04035                            | 0.999562                         | Arl6ip5                                                                                                                                                                                                                                                               |
| 17878832              | 9.33                               | 9.18                                | 1.11                                      | 0.1505597          | 0.041242                           | 0.999562                         | Armcx2                                                                                                                                                                                                                                                                |
| 17859930              | 8.63                               | 8.48                                | 1.11                                      | 0.1505597          | 0.042076                           | 0.999562                         | Creb1                                                                                                                                                                                                                                                                 |
| 17648712              | 7.35                               | 7.2                                 | 1.11                                      | 0.1505597          | 0.043874                           | 0.999562                         | RGD1309077                                                                                                                                                                                                                                                            |
| 17834867              | 9.42                               | 9.28                                | 1.11                                      | 0.1505597          | 0.044037                           | 0.999562                         | Chpt1                                                                                                                                                                                                                                                                 |
| 17769017              | 6.33                               | 6.19                                | 1.11                                      | 0.1505597          | 0.048053                           | 0.999562                         | Slc2a10                                                                                                                                                                                                                                                               |
| 17611290              | 9.7                                | 9.55                                | 1.11                                      | 0.1505597          | 0.048636                           | 0.999562                         | Pdcd6                                                                                                                                                                                                                                                                 |
| 17835359              | 9.9                                | 9.76                                | 1.11                                      | 0.1505597          | 0.049307                           | 0.999562                         | Nudt4                                                                                                                                                                                                                                                                 |
| 17861494              | 7.37                               | 7.23                                | 1.1                                       | 0.1375035          | 0.001137                           | 0.999562                         | Cxcr7                                                                                                                                                                                                                                                                 |
| 17818342              | 8.99                               | 8.85                                | 1.1                                       | 0.1375035          | 0.002856                           | 0.999562                         | Yy1                                                                                                                                                                                                                                                                   |
| 17837024              | 7.63                               | 7.49                                | 1.1                                       | 0.1375035          | 0.007097                           | 0.999562                         | Slc25a32                                                                                                                                                                                                                                                              |
| 17782065              | 10.1                               | 9.97                                | 1.1                                       | 0.1375035          | 0.007237                           | 0.999562                         | Atp6v1f                                                                                                                                                                                                                                                               |
| 17668877              | 9.34                               | 9.2                                 | 1.1                                       | 0.1375035          | 0.008511                           | 0.999562                         | Atg3                                                                                                                                                                                                                                                                  |
| 17651309              | 7.66                               | 7.52                                | 1.1                                       | 0.1375035          | 0.011046                           | 0.999562                         | G6pc; Aoc3; Psme3                                                                                                                                                                                                                                                     |
| 17750404              | 8.68                               | 8.54                                | 1.1                                       | 0.1375035          | 0.015557                           | 0.999562                         | Gstm7                                                                                                                                                                                                                                                                 |
| 17627328              | 7.43                               | 7.28                                | 1.1                                       | 0.1375035          | 0.016264                           | 0.999562                         | Ltv1                                                                                                                                                                                                                                                                  |
| 17658044              | 9.15                               | 9.01                                | 1.1                                       | 0.1375035          | 0.016396                           | 0.999562                         | RGD1308134                                                                                                                                                                                                                                                            |
| 17758309              | 9.93                               | 9.8                                 | 1.1                                       | 0.1375035          | 0.019305                           | 0.999562                         | Ddit4                                                                                                                                                                                                                                                                 |
| 17684016              | 6.53                               | 6.39                                | 1.1                                       | 0.1375035          | 0.020544                           | 0.999562                         | Ii19                                                                                                                                                                                                                                                                  |
| 1777521               | 9.89                               | 9.76                                | 1.1                                       | 0.1375035          | 0.026123                           | 0.999562                         | Tmem230                                                                                                                                                                                                                                                               |
| 17711288              | 8.16                               | 8.02                                | 1.1                                       | 0.1375035          | 0.02974                            | 0.999562                         | Tmem192                                                                                                                                                                                                                                                               |
| 17881163              | 8.12                               | 7.98                                | 1.1                                       | 0.1375035          | 0.035015                           | 0.999562                         | LOC100363176                                                                                                                                                                                                                                                          |
| 17749347              | 7.99                               | 7.85                                | 1.1                                       | 0.1375035          | 0.036511                           | 0.999562                         | LOC100363361                                                                                                                                                                                                                                                          |
| 17881957              | 8.3                                | 8.16                                | 1.1                                       | 0.1375035          | 0.039617                           | 0.999562                         | LOC688318; Cyp27b1; Chchd2; LOC684871; Fabp5; Lce1l; Lsm2; LOC100362916; LOC682812; LOC684372; LOC100366231; LOC682352; LOC100910788; LOC501317; LOC684892; LOC100909462; LOC689635; LOC100909409; LOC100911002; LOC100910163; LOC100911516; RGD1561986; rno-mir-3584 |
| 17878378              | 8.31                               | 8.17                                | 1.1                                       | 0.1375035          | 0.040649                           | 0.999562                         | Magt1                                                                                                                                                                                                                                                                 |
| 17717908              | 5.21                               | 5.08                                | 1.1                                       | 0.1375035          | 0.041862                           | 0.999562                         | Spata31d1b                                                                                                                                                                                                                                                            |
| 17859846              | 11.32                              | 11.19                               | 1.1                                       | 0.1375035          | 0.042115                           | 0.999562                         | Rpl37; LOC690840; LOC100360781; LOC100360841; LOC100365214                                                                                                                                                                                                            |
| 17757508              | 9.4                                | 9.26                                | 1.1                                       | 0.1375035          | 0.047452                           | 0.999562                         | Cstb                                                                                                                                                                                                                                                                  |
| 17880368              | 12.05                              | 11.91                               | 1.1                                       | 0.1375035          | 0.047802                           | 0.999562                         | LOC685718                                                                                                                                                                                                                                                             |
| 17821215              | 8.59                               | 8.47                                | 1.09                                      | 0.1243281          | 0.005929                           | 0.999562                         | Itgb1bp1                                                                                                                                                                                                                                                              |
| 17803953              | 5.79                               | 5.66                                | 1.09                                      | 0.1243281          | 0.006438                           | 0.999562                         | Agmat                                                                                                                                                                                                                                                                 |
| 17808953              | 4.11                               | 3.99                                | 1.09                                      | 0.1243281          | 0.007283                           | 0.999562                         | RGD1562532                                                                                                                                                                                                                                                            |
| 17751413              | 7.94                               | 7.81                                | 1.09                                      | 0.1243281          | 0.009696                           | 0.999562                         | Ostc                                                                                                                                                                                                                                                                  |
| 17622272              | 10.84                              | 10.71                               | 1.09                                      | 0.1243281          | 0.012019                           | 0.999562                         | Rplp2; LOC100911575                                                                                                                                                                                                                                                   |
| 17834069              | 6.2                                | 6.07                                | 1.09                                      | 0.1243281          | 0.014101                           | 0.999562                         | Giot1                                                                                                                                                                                                                                                                 |
| 17630055              | 6.28                               | 6.15                                | 1.09                                      | 0.1243281          | 0.014991                           | 0.999562                         | Npas1                                                                                                                                                                                                                                                                 |
| 17816314              | 10.39                              | 10.27                               | 1.09                                      | 0.1243281          | 0.018597                           | 0.999562                         | Tmx1                                                                                                                                                                                                                                                                  |
| 17786877              | 8.7                                | 8.58                                | 1.09                                      | 0.1243281          | 0.021103                           | 0.999562                         | M6pr; LOC100909548                                                                                                                                                                                                                                                    |

| Transcript Cluster ID | Injury Bi-weight Avg Signal (log2) | Control Bi-weight Avg Signal (log2) | Fold Change (linear) (Injury vs. Control) | Fold Change (log2) | ANOVA p-value (Injury vs. Control) | FDR p-value (Injury vs. Control) | Gene Symbol                                                                                                                                                                                                                                                           |
|-----------------------|------------------------------------|-------------------------------------|-------------------------------------------|--------------------|------------------------------------|----------------------------------|-----------------------------------------------------------------------------------------------------------------------------------------------------------------------------------------------------------------------------------------------------------------------|
| 17773787              | 7.6                                | 7.48                                | 1.09                                      | 0.1243281          | 0.02919                            | 0.999562                         | Zfp385b                                                                                                                                                                                                                                                               |
| 17862257              | 8.28                               | 8.16                                | 1.09                                      | 0.1243281          | 0.02955                            | 0.999562                         | Zfp161                                                                                                                                                                                                                                                                |
| 17697062              | 5.35                               | 5.22                                | 1.09                                      | 0.1243281          | 0.03148                            | 0.999562                         | Synpo2l                                                                                                                                                                                                                                                               |
| 17854612              | 7.17                               | 7.04                                | 1.09                                      | 0.1243281          | 0.04352                            | 0.999562                         | Tmed3                                                                                                                                                                                                                                                                 |
| 17870827              | 8.02                               | 7.89                                | 1.09                                      | 0.1243281          | 0.044503                           | 0.999562                         | Ndp; LOC100909913                                                                                                                                                                                                                                                     |
| 17821652              | 11.04                              | 10.93                               | 1.08                                      | 0.1110313          | 0.000793                           | 0.999562                         | St13; LOC100362999                                                                                                                                                                                                                                                    |
| 17854761              | 9.51                               | 9.41                                | 1.08                                      | 0.1110313          | 0.000832                           | 0.999562                         | Atp1b3                                                                                                                                                                                                                                                                |
| 17622041              | 5.53                               | 5.42                                | 1.08                                      | 0.1110313          | 0.001465                           | 0.999562                         | Scgb1c1                                                                                                                                                                                                                                                               |
| 17650636              | 8.7                                | 8.59                                | 1.08                                      | 0.1110313          | 0.00225                            | 0.999562                         | Mrpl45                                                                                                                                                                                                                                                                |
| 17843868              | 8.65                               | 8.54                                | 1.08                                      | 0.1110313          | 0.011693                           | 0.999562                         | Zfp259                                                                                                                                                                                                                                                                |
| 17675923              | 8.8                                | 8.69                                | 1.08                                      | 0.1110313          | 0.012996                           | 0.999562                         | Bri3                                                                                                                                                                                                                                                                  |
| 17721797              | 6.41                               | 6.31                                | 1.08                                      | 0.1110313          | 0.014041                           | 0.999562                         | Rnf125                                                                                                                                                                                                                                                                |
| 17849209              | 9.38                               | 9.27                                | 1.08                                      | 0.1110313          | 0.014467                           | 0.999562                         | Sacm1l                                                                                                                                                                                                                                                                |
| 17694730              | 9.36                               | 9.26                                | 1.08                                      | 0.1110313          | 0.014958                           | 0.999562                         | Anapc4                                                                                                                                                                                                                                                                |
| 17653004              | 9.28                               | 9.16                                | 1.08                                      | 0.1110313          | 0.016542                           | 0.999562                         | Sec14l1                                                                                                                                                                                                                                                               |
| 17742074              | 6.91                               | 6.79                                | 1.08                                      | 0.1110313          | 0.016556                           | 0.999562                         | Col11a1                                                                                                                                                                                                                                                               |
| 17650526              | 6.04                               | 5.93                                | 1.08                                      | 0.1110313          | 0.016653                           | 0.999562                         | Hoxb6                                                                                                                                                                                                                                                                 |
| 17669086              | 7.73                               | 7.63                                | 1.08                                      | 0.1110313          | 0.017546                           | 0.999562                         | Tmem39a                                                                                                                                                                                                                                                               |
| 17710636              | 9.66                               | 9.55                                | 1.08                                      | 0.1110313          | 0.022465                           | 0.999562                         | Rab8a                                                                                                                                                                                                                                                                 |
| 17797345              | 7.72                               | 7.61                                | 1.08                                      | 0.1110313          | 0.02379                            | 0.999562                         | Triqk                                                                                                                                                                                                                                                                 |
| 17861201              | 6.47                               | 6.36                                | 1.08                                      | 0.1110313          | 0.024538                           | 0.999562                         | Efhd1                                                                                                                                                                                                                                                                 |
| 17804598              | 11.29                              | 11.19                               | 1.08                                      | 0.1110313          | 0.02481                            | 0.999562                         | Rpl22                                                                                                                                                                                                                                                                 |
| 17726177              | 9.52                               | 9.41                                | 1.08                                      | 0.1110313          | 0.026158                           | 0.999562                         | Atg12                                                                                                                                                                                                                                                                 |
| 17846248              | 5.65                               | 5.54                                | 1.08                                      | 0.1110313          | 0.026845                           | 0.999562                         | Mei4                                                                                                                                                                                                                                                                  |
| 17705450              | 7.87                               | 7.76                                | 1.08                                      | 0.1110313          | 0.028316                           | 0.999562                         | Tmtc4                                                                                                                                                                                                                                                                 |
| 17793715              | 9.56                               | 9.45                                | 1.08                                      | 0.1110313          | 0.029435                           | 0.999562                         | Crbn                                                                                                                                                                                                                                                                  |
| 17821373              | 5.92                               | 5.81                                | 1.08                                      | 0.1110313          | 0.029863                           | 0.999562                         | Pxdn                                                                                                                                                                                                                                                                  |
| 17717060              | 9.12                               | 9.01                                | 1.08                                      | 0.1110313          | 0.030804                           | 0.999562                         | Prpf18                                                                                                                                                                                                                                                                |
| 17785146              | 8.44                               | 8.34                                | 1.08                                      | 0.1110313          | 0.035476                           | 0.999562                         | Fam136a                                                                                                                                                                                                                                                               |
| 17827299              | 7.17                               | 7.06                                | 1.08                                      | 0.1110313          | 0.040085                           | 0.999562                         | LOC691921                                                                                                                                                                                                                                                             |
| 17826085              | 5.12                               | 5.01                                | 1.08                                      | 0.1110313          | 0.042384                           | 0.999562                         | Gipc3                                                                                                                                                                                                                                                                 |
| 17849064              | 8.06                               | 7.95                                | 1.08                                      | 0.1110313          | 0.043149                           | 0.999562                         | Tcaim                                                                                                                                                                                                                                                                 |
| 17783840              | 8.8                                | 8.69                                | 1.08                                      | 0.1110313          | 0.044391                           | 0.999562                         | Avl9                                                                                                                                                                                                                                                                  |
| 17651928              | 7.32                               | 7.21                                | 1.08                                      | 0.1110313          | 0.044534                           | 0.999562                         | Mrc2                                                                                                                                                                                                                                                                  |
| 17671438              | 8.93                               | 8.83                                | 1.08                                      | 0.1110313          | 0.044755                           | 0.999562                         | N4bp2l2                                                                                                                                                                                                                                                               |
| 17612316              | 8.73                               | 8.62                                | 1.08                                      | 0.1110313          | 0.045666                           | 0.999562                         | Tbp                                                                                                                                                                                                                                                                   |
| 17823417              | 8.05                               | 7.94                                | 1.08                                      | 0.1110313          | 0.046015                           | 0.999562                         | Pomt2                                                                                                                                                                                                                                                                 |
| 17733202              | 7.8                                | 7.69                                | 1.08                                      | 0.1110313          | 0.046237                           | 0.999562                         | Psemb10                                                                                                                                                                                                                                                               |
| 17624053              | 10.51                              | 10.39                               | 1.08                                      | 0.1110313          | 0.048529                           | 0.999562                         | Ddb1                                                                                                                                                                                                                                                                  |
| 17654541              | 8                                  | 7.9                                 | 1.08                                      | 0.1110313          | 0.049172                           | 0.999562                         | Tbl3                                                                                                                                                                                                                                                                  |
| 17652887              | 8.23                               | 8.12                                | 1.08                                      | 0.1110313          | 0.049566                           | 0.999562                         | Unk                                                                                                                                                                                                                                                                   |
| 17715167              | 8.95                               | 8.85                                | 1.07                                      | 0.0976108          | 0.000491                           | 0.897373                         | Eef1e1                                                                                                                                                                                                                                                                |
| 17646169              | 4.01                               | 3.92                                | 1.07                                      | 0.0976108          | 0.006734                           | 0.999562                         | LOC24906                                                                                                                                                                                                                                                              |
| 17773252              | 6.95                               | 6.85                                | 1.07                                      | 0.0976108          | 0.010013                           | 0.999562                         | Wipf1                                                                                                                                                                                                                                                                 |
| 17729695              | 9.94                               | 9.84                                | 1.07                                      | 0.0976108          | 0.011856                           | 0.999562                         | LOC100360573                                                                                                                                                                                                                                                          |
| 17730529              | 6.11                               | 6.02                                | 1.07                                      | 0.0976108          | 0.014693                           | 0.999562                         | Osgin1                                                                                                                                                                                                                                                                |
| 17736736              | 8.23                               | 8.14                                | 1.07                                      | 0.0976108          | 0.014993                           | 0.999562                         | Myo10                                                                                                                                                                                                                                                                 |
| 17657793              | 8.47                               | 8.36                                | 1.07                                      | 0.0976108          | 0.015384                           | 0.999562                         | Senp3                                                                                                                                                                                                                                                                 |
| 17709601              | 9.95                               | 9.85                                | 1.07                                      | 0.0976108          | 0.01653                            | 0.999562                         | Appl1                                                                                                                                                                                                                                                                 |
| 17810783              | 9.02                               | 8.92                                | 1.07                                      | 0.0976108          | 0.02798                            | 0.999562                         | Rbbp4                                                                                                                                                                                                                                                                 |
| 17778986              | 8.82                               | 8.73                                | 1.07                                      | 0.0976108          | 0.028727                           | 0.999562                         | Zhx3                                                                                                                                                                                                                                                                  |
| 17666512              | 10.1                               | 10                                  | 1.07                                      | 0.0976108          | 0.033503                           | 0.999562                         | Fgf12                                                                                                                                                                                                                                                                 |
| 17733650              | 6.27                               | 6.18                                | 1.07                                      | 0.0976108          | 0.034956                           | 0.999562                         | Fa2h                                                                                                                                                                                                                                                                  |
| 17797143              | 11.26                              | 11.16                               | 1.07                                      | 0.0976108          | 0.036244                           | 0.999562                         | Sdcbp                                                                                                                                                                                                                                                                 |
| 17804980              | 10.15                              | 10.04                               | 1.07                                      | 0.0976108          | 0.038193                           | 0.999562                         | LOC100364191                                                                                                                                                                                                                                                          |
| 17882135              | 9.15                               | 9.06                                | 1.07                                      | 0.0976108          | 0.041024                           | 0.999562                         | LOC688318; Cyp27b1; Chchd2; LOC684871; Fabp5; Lce1l; Lsm2; LOC100362916; LOC682812; LOC684372; LOC100366231; LOC682352; LOC100910788; LOC501317; LOC684892; LOC100909462; LOC689635; LOC100909409; LOC100911002; LOC100910163; LOC100911516; RGD1561986; rno-mir-3584 |
| 17753973              | 6.44                               | 6.35                                | 1.07                                      | 0.0976108          | 0.042163                           | 0.999562                         | Slc37a1                                                                                                                                                                                                                                                               |
| 17664499              | 5.95                               | 5.85                                | 1.07                                      | 0.0976108          | 0.044054                           | 0.999562                         | LOC100363184                                                                                                                                                                                                                                                          |
| 17715873              | 8.33                               | 8.23                                | 1.07                                      | 0.0976108          | 0.048985                           | 0.999562                         | Zkscan3                                                                                                                                                                                                                                                               |
| 17806052              | 3.02                               | 2.94                                | 1.06                                      | 0.0840643          | 0.001112                           | 0.999562                         | Cnbd1                                                                                                                                                                                                                                                                 |

| Transcript Cluster ID | Injury Bi-weight Avg Signal (log2) | Control Bi-weight Avg Signal (log2) | Fold Change (linear) (Injury vs. Control) | Fold Change (log2) | ANOVA p-value (Injury vs. Control) | FDR p-value (Injury vs. Control) | Gene Symbol                                                                                                                                                                                                                                                           |
|-----------------------|------------------------------------|-------------------------------------|-------------------------------------------|--------------------|------------------------------------|----------------------------------|-----------------------------------------------------------------------------------------------------------------------------------------------------------------------------------------------------------------------------------------------------------------------|
| 17656485              | 4.31                               | 4.23                                | 1.06                                      | 0.0840643          | 0.002418                           | 0.999562                         | LOC686792                                                                                                                                                                                                                                                             |
| 17848586              | 8.66                               | 8.58                                | 1.06                                      | 0.0840643          | 0.017032                           | 0.999562                         | Abhd5                                                                                                                                                                                                                                                                 |
| 17826234              | 7.58                               | 7.49                                | 1.06                                      | 0.0840643          | 0.022432                           | 0.999562                         | Plekhj1                                                                                                                                                                                                                                                               |
| 17756721              | 4.63                               | 4.55                                | 1.06                                      | 0.0840643          | 0.028773                           | 0.999562                         | Tesb                                                                                                                                                                                                                                                                  |
| 17619304              | 8.93                               | 8.84                                | 1.06                                      | 0.0840643          | 0.029134                           | 0.999562                         | Ilk                                                                                                                                                                                                                                                                   |
| 17717253              | 8.53                               | 8.45                                | 1.06                                      | 0.0840643          | 0.036381                           | 0.999562                         | Arl5b                                                                                                                                                                                                                                                                 |
| 17672137              | 7.31                               | 7.22                                | 1.06                                      | 0.0840643          | 0.036592                           | 0.999562                         | Psmg3                                                                                                                                                                                                                                                                 |
| 17858306              | 7.71                               | 7.63                                | 1.06                                      | 0.0840643          | 0.043379                           | 0.999562                         | Amer3                                                                                                                                                                                                                                                                 |
| 17881078              | 12.18                              | 12.09                               | 1.06                                      | 0.0840643          | 0.044446                           | 0.999562                         | LOC100360791                                                                                                                                                                                                                                                          |
| 17870139              | 8.94                               | 8.86                                | 1.06                                      | 0.0840643          | 0.045253                           | 0.999562                         | Timmec1                                                                                                                                                                                                                                                               |
| 17787279              | 9.35                               | 9.26                                | 1.06                                      | 0.0840643          | 0.04684                            | 0.999562                         | Mrpl51                                                                                                                                                                                                                                                                |
| 17797006              | 8.35                               | 8.28                                | 1.05                                      | 0.0703893          | 0.017832                           | 0.999562                         | Rgs20                                                                                                                                                                                                                                                                 |
| 17813740              | 7.19                               | 7.12                                | 1.05                                      | 0.0703893          | 0.023635                           | 0.999562                         | Dync2li1                                                                                                                                                                                                                                                              |
| 17667043              | 8.32                               | 8.25                                | 1.05                                      | 0.0703893          | 0.027932                           | 0.999562                         | Prodh                                                                                                                                                                                                                                                                 |
| 17882015              | 7.75                               | 7.68                                | 1.05                                      | 0.0703893          | 0.03257                            | 0.999562                         | LOC688318; Cyp27b1; Chchd2; LOC684871; Fabp5; Lce1l; Lsm2; LOC100362916; LOC682812; LOC684372; LOC100366231; LOC682352; LOC100910788; LOC501317; LOC684892; LOC100909462; LOC689635; LOC100909409; LOC100911002; LOC100910163; LOC100911516; RGD1561986; rno-mir-3584 |
| 17805031              | 7.26                               | 7.19                                | 1.05                                      | 0.0703893          | 0.039298                           | 0.999562                         | Mxra8                                                                                                                                                                                                                                                                 |
| 17805459              | 6.42                               | 6.34                                | 1.05                                      | 0.0703893          | 0.041213                           | 0.999562                         | Adhfe1                                                                                                                                                                                                                                                                |
| 17794925              | 9.04                               | 8.97                                | 1.05                                      | 0.0703893          | 0.042177                           | 0.999562                         | Cops7a                                                                                                                                                                                                                                                                |
| 17664022              | 9.44                               | 9.37                                | 1.05                                      | 0.0703893          | 0.042688                           | 0.999562                         | Thoc4                                                                                                                                                                                                                                                                 |
| 17623800              | 8.12                               | 8.05                                | 1.05                                      | 0.0703893          | 0.044093                           | 0.999562                         | LOC690349                                                                                                                                                                                                                                                             |
| 17858326              | 10.22                              | 10.15                               | 1.05                                      | 0.0703893          | 0.045332                           | 0.999562                         | Plekhb2                                                                                                                                                                                                                                                               |
| 17640286              | 9.89                               | 9.82                                | 1.05                                      | 0.0703893          | 0.046051                           | 0.999562                         | Polr2g                                                                                                                                                                                                                                                                |
| 17816275              | 9.18                               | 9.11                                | 1.05                                      | 0.0703893          | 0.046109                           | 0.999562                         | Arf6                                                                                                                                                                                                                                                                  |
| 17718168              | 10.93                              | 10.86                               | 1.05                                      | 0.0703893          | 0.048408                           | 0.999562                         | Prelid1                                                                                                                                                                                                                                                               |
| 17646320              | 6.96                               | 6.91                                | 1.04                                      | 0.0565835          | 0.000849                           | 0.999562                         | Jmjd4                                                                                                                                                                                                                                                                 |
| 17774581              | 9.03                               | 8.97                                | 1.04                                      | 0.0565835          | 0.004526                           | 0.999562                         | Mdk                                                                                                                                                                                                                                                                   |
| 17648002              | 8.72                               | 8.65                                | 1.04                                      | 0.0565835          | 0.008921                           | 0.999562                         | Txndc17                                                                                                                                                                                                                                                               |
| 17801885              | 9.04                               | 8.99                                | 1.04                                      | 0.0565835          | 0.025576                           | 0.999562                         | Rragc                                                                                                                                                                                                                                                                 |
| 17764003              | 8.66                               | 8.6                                 | 1.04                                      | 0.0565835          | 0.030943                           | 0.999562                         | Arfgap2                                                                                                                                                                                                                                                               |
| 17717913              | 8.9                                | 8.85                                | 1.04                                      | 0.0565835          | 0.038976                           | 0.999562                         | Naa35                                                                                                                                                                                                                                                                 |
| 17724936              | 11.72                              | 11.66                               | 1.04                                      | 0.0565835          | 0.042052                           | 0.999562                         | Rpl39; LOC100361661; LOC100363391; LOC100364645                                                                                                                                                                                                                       |
| 17814018              | 9.61                               | 9.55                                | 1.04                                      | 0.0565835          | 0.042138                           | 0.999562                         | Fam98a                                                                                                                                                                                                                                                                |
| 17731611              | 10.66                              | 10.62                               | 1.03                                      | 0.0426443          | 0.003722                           | 0.999562                         | Arl2bp                                                                                                                                                                                                                                                                |
| 17732480              | 8.83                               | 8.79                                | 1.03                                      | 0.0426443          | 0.006108                           | 0.999562                         | Farsa                                                                                                                                                                                                                                                                 |
| 17842051              | 11.07                              | 11.02                               | 1.03                                      | 0.0426443          | 0.006545                           | 0.999562                         | Sesn3                                                                                                                                                                                                                                                                 |
| 17716548              | 10.72                              | 10.68                               | 1.03                                      | 0.0426443          | 0.007526                           | 0.999562                         | Zmynd11                                                                                                                                                                                                                                                               |
| 17793404              | 8.76                               | 8.72                                | 1.03                                      | 0.0426443          | 0.013142                           | 0.999562                         | Magi1                                                                                                                                                                                                                                                                 |
| 17642377              | 8.31                               | 8.26                                | 1.03                                      | 0.0426443          | 0.020064                           | 0.999562                         | Mrpl43                                                                                                                                                                                                                                                                |
| 17792158              | 8.57                               | 8.53                                | 1.03                                      | 0.0426443          | 0.023978                           | 0.999562                         | Kdm3a                                                                                                                                                                                                                                                                 |
| 17802092              | 8.51                               | 8.46                                | 1.03                                      | 0.0426443          | 0.024552                           | 0.999562                         | Oscp1                                                                                                                                                                                                                                                                 |
| 17854929              | 9.27                               | 9.23                                | 1.03                                      | 0.0426443          | 0.024864                           | 0.999562                         | Armc8                                                                                                                                                                                                                                                                 |
| 17803776              | 9.98                               | 9.93                                | 1.03                                      | 0.0426443          | 0.045793                           | 0.999562                         | Sdhd                                                                                                                                                                                                                                                                  |
| 17658951              | 9.26                               | 9.21                                | 1.03                                      | 0.0426443          | 0.047851                           | 0.999562                         | Tnfrsf1                                                                                                                                                                                                                                                               |
| 17724896              | 9.09                               | 9.06                                | 1.02                                      | 0.0285692          | 0.002662                           | 0.999562                         | Zfp521                                                                                                                                                                                                                                                                |
| 17838957              | 9.76                               | 9.72                                | 1.02                                      | 0.0285692          | 0.010682                           | 0.999562                         | Eif3d                                                                                                                                                                                                                                                                 |
| 17721440              | 10.24                              | 10.21                               | 1.02                                      | 0.0285692          | 0.049375                           | 0.999562                         | Mib1                                                                                                                                                                                                                                                                  |
| 17810207              | 10.05                              | 10.08                               | -1.02                                     | -0.0285692         | 0.032914                           | 0.999562                         | Smad2                                                                                                                                                                                                                                                                 |
| 17820928              | 9.4                                | 9.44                                | -1.03                                     | -0.042644          | 0.049381                           | 0.999562                         | Efr3b                                                                                                                                                                                                                                                                 |
| 17700110              | 9.37                               | 9.42                                | -1.04                                     | -0.056584          | 0.00267                            | 0.999562                         | Zc3h13                                                                                                                                                                                                                                                                |
| 17830667              | 10.39                              | 10.45                               | -1.04                                     | -0.056584          | 0.006027                           | 0.999562                         | Tomm22                                                                                                                                                                                                                                                                |
| 17821097              | 10.71                              | 10.76                               | -1.04                                     | -0.056584          | 0.013301                           | 0.999562                         | Ddx1                                                                                                                                                                                                                                                                  |
| 17702184              | 9.02                               | 9.07                                | -1.04                                     | -0.056584          | 0.02564                            | 0.999562                         | Rab2b                                                                                                                                                                                                                                                                 |
| 17808587              | 10.13                              | 10.19                               | -1.04                                     | -0.056584          | 0.030297                           | 0.999562                         | Elavl2                                                                                                                                                                                                                                                                |
| 17722731              | 7.91                               | 7.97                                | -1.04                                     | -0.056584          | 0.032173                           | 0.999562                         | PCDHGA6                                                                                                                                                                                                                                                               |
| 17639197              | 9.11                               | 9.17                                | -1.04                                     | -0.056584          | 0.033342                           | 0.999562                         | Ankrd13d                                                                                                                                                                                                                                                              |
| 17620723              | 7.07                               | 7.15                                | -1.05                                     | -0.070389          | 0.013757                           | 0.999562                         | Hirip3                                                                                                                                                                                                                                                                |
| 17687394              | 9.55                               | 9.62                                | -1.05                                     | -0.070389          | 0.018158                           | 0.999562                         | Mark1                                                                                                                                                                                                                                                                 |
| 17643588              | 9.49                               | 9.55                                | -1.05                                     | -0.070389          | 0.019887                           | 0.999562                         | Dexi                                                                                                                                                                                                                                                                  |
| 17761716              | 7.53                               | 7.6                                 | -1.05                                     | -0.070389          | 0.023319                           | 0.999562                         | Avpi1                                                                                                                                                                                                                                                                 |



| Transcript Cluster ID | Injury Bi-weight Avg Signal (log2) | Control Bi-weight Avg Signal (log2) | Fold Change (linear) (Injury vs. Control) | Fold Change (log2) | ANOVA p-value (Injury vs. Control) | FDR p-value (Injury vs. Control) | Gene Symbol                                                                                                                                                                                                                                                           |
|-----------------------|------------------------------------|-------------------------------------|-------------------------------------------|--------------------|------------------------------------|----------------------------------|-----------------------------------------------------------------------------------------------------------------------------------------------------------------------------------------------------------------------------------------------------------------------|
| 17792187              | 8.83                               | 8.9                                 | -1.05                                     | -0.070389          | 0.024514                           | 0.999562                         | Mrpl35                                                                                                                                                                                                                                                                |
| 17854075              | 4.2                                | 4.28                                | -1.05                                     | -0.070389          | 0.027798                           | 0.999562                         | Fam83b                                                                                                                                                                                                                                                                |
| 17746315              | 9.75                               | 9.82                                | -1.05                                     | -0.070389          | 0.043602                           | 0.999562                         | Raly1                                                                                                                                                                                                                                                                 |
| 17855786              | 9.79                               | 9.85                                | -1.05                                     | -0.070389          | 0.047228                           | 0.999562                         | Wdr6                                                                                                                                                                                                                                                                  |
| 17794781              | 9.47                               | 9.53                                | -1.05                                     | -0.070389          | 0.047281                           | 0.999562                         | Grcc10; LOC100911713                                                                                                                                                                                                                                                  |
| 17822701              | 4.92                               | 5.01                                | -1.06                                     | -0.084064          | 0.001939                           | 0.999562                         | Esr2                                                                                                                                                                                                                                                                  |
| 17619466              | 7.76                               | 7.84                                | -1.06                                     | -0.084064          | 0.009313                           | 0.999562                         | Akip1                                                                                                                                                                                                                                                                 |
| 17713314              | 5.89                               | 5.97                                | -1.06                                     | -0.084064          | 0.010967                           | 0.999562                         | Gdf2                                                                                                                                                                                                                                                                  |
| 17824403              | 9.46                               | 9.54                                | -1.06                                     | -0.084064          | 0.026901                           | 0.999562                         | Cdc42bpb                                                                                                                                                                                                                                                              |
| 17770545              | 5.66                               | 5.74                                | -1.06                                     | -0.084064          | 0.02791                            | 0.999562                         | C030048H21Rik                                                                                                                                                                                                                                                         |
| 17804603              | 9.2                                | 9.28                                | -1.06                                     | -0.084064          | 0.031152                           | 0.999562                         | Chd5                                                                                                                                                                                                                                                                  |
| 17828097              | 8.34                               | 8.43                                | -1.06                                     | -0.084064          | 0.031378                           | 0.999562                         | Csrp2                                                                                                                                                                                                                                                                 |
| 17704875              | 6.62                               | 6.7                                 | -1.06                                     | -0.084064          | 0.032453                           | 0.999562                         | LOC306096                                                                                                                                                                                                                                                             |
| 17839278              | 7.22                               | 7.31                                | -1.06                                     | -0.084064          | 0.038685                           | 0.999562                         | Rps19bp1                                                                                                                                                                                                                                                              |
| 17610464              | 9.08                               | 9.17                                | -1.06                                     | -0.084064          | 0.039027                           | 0.999562                         | Shprh                                                                                                                                                                                                                                                                 |
| 17814921              | 7.7                                | 7.78                                | -1.06                                     | -0.084064          | 0.040436                           | 0.999562                         | Nol10                                                                                                                                                                                                                                                                 |
| 17865896              | 8.2                                | 8.29                                | -1.06                                     | -0.084064          | 0.04134                            | 0.999562                         | RGD1561963                                                                                                                                                                                                                                                            |
| 17714533              | 9.58                               | 9.67                                | -1.06                                     | -0.084064          | 0.047027                           | 0.999562                         | Gprin1                                                                                                                                                                                                                                                                |
| 17740644              | 8.7                                | 8.79                                | -1.06                                     | -0.084064          | 0.048664                           | 0.999562                         | Tdrkh                                                                                                                                                                                                                                                                 |
| 17641203              | 9.49                               | 9.59                                | -1.07                                     | -0.097611          | 0.000513                           | 0.897373                         | Smc5                                                                                                                                                                                                                                                                  |
| 17870953              | 7.87                               | 7.98                                | -1.07                                     | -0.097611          | 0.011808                           | 0.999562                         | Bcor                                                                                                                                                                                                                                                                  |
| 17682462              | 7.79                               | 7.89                                | -1.07                                     | -0.097611          | 0.012102                           | 0.999562                         | Kif26b                                                                                                                                                                                                                                                                |
| 17788981              | 9.19                               | 9.28                                | -1.07                                     | -0.097611          | 0.017234                           | 0.999562                         | Cacna2d1                                                                                                                                                                                                                                                              |
| 17804509              | 9.28                               | 9.38                                | -1.07                                     | -0.097611          | 0.017842                           | 0.999562                         | Nol9                                                                                                                                                                                                                                                                  |
| 17805774              | 7.28                               | 7.38                                | -1.07                                     | -0.097611          | 0.01905                            | 0.999562                         | Plekhf2                                                                                                                                                                                                                                                               |
| 17773262              | 5.83                               | 5.93                                | -1.07                                     | -0.097611          | 0.02092                            | 0.999562                         | Chrna1                                                                                                                                                                                                                                                                |
| 17755510              | 9.86                               | 9.96                                | -1.07                                     | -0.097611          | 0.020969                           | 0.999562                         | Rev3l                                                                                                                                                                                                                                                                 |
| 17627906              | 10.97                              | 11.07                               | -1.07                                     | -0.097611          | 0.024701                           | 0.999562                         | LOC100363248                                                                                                                                                                                                                                                          |
| 17643106              | 9.04                               | 9.14                                | -1.07                                     | -0.097611          | 0.03127                            | 0.999562                         | Hspa12a                                                                                                                                                                                                                                                               |
| 17881809              | 8.97                               | 9.08                                | -1.07                                     | -0.097611          | 0.034708                           | 0.999562                         | LOC688318; Cyp27b1; Chchd2; LOC684871; Fabp5; Lce1l; Lsm2; LOC100362916; LOC682812; LOC684372; LOC100366231; LOC682352; LOC100910788; LOC501317; LOC684892; LOC100909462; LOC689635; LOC100909409; LOC100911002; LOC100910163; LOC100911516; RGD1561986; rno-mir-3584 |
| 17793817              | 8.5                                | 8.6                                 | -1.07                                     | -0.097611          | 0.038465                           | 0.999562                         | Tada3; Tada3lb                                                                                                                                                                                                                                                        |
| 17787596              | 3.11                               | 3.21                                | -1.07                                     | -0.097611          | 0.040609                           | 0.999562                         | Klre1                                                                                                                                                                                                                                                                 |
| 17770144              | 7.11                               | 7.21                                | -1.07                                     | -0.097611          | 0.045419                           | 0.999562                         | Tor4a                                                                                                                                                                                                                                                                 |
| 17661681              | 6.17                               | 6.27                                | -1.07                                     | -0.097611          | 0.045567                           | 0.999562                         | Brca1                                                                                                                                                                                                                                                                 |
| 17718262              | 5.97                               | 6.06                                | -1.07                                     | -0.097611          | 0.04782                            | 0.999562                         | Eif4e1b                                                                                                                                                                                                                                                               |
| 17688028              | 6.81                               | 6.91                                | -1.07                                     | -0.097611          | 0.049408                           | 0.999562                         | Tgfbr3                                                                                                                                                                                                                                                                |
| 17709173              | 6.9                                | 7.02                                | -1.08                                     | -0.111031          | 0.004014                           | 0.999562                         | Erich1                                                                                                                                                                                                                                                                |
| 17667934              | 8.16                               | 8.27                                | -1.08                                     | -0.111031          | 0.010728                           | 0.999562                         | Gart                                                                                                                                                                                                                                                                  |
| 17872886              | 4.95                               | 5.06                                | -1.08                                     | -0.111031          | 0.015219                           | 0.999562                         | Heph                                                                                                                                                                                                                                                                  |
| 17798570              | 8.54                               | 8.66                                | -1.08                                     | -0.111031          | 0.016173                           | 0.999562                         | Tdrd7                                                                                                                                                                                                                                                                 |
| 17655641              | 9.54                               | 9.65                                | -1.08                                     | -0.111031          | 0.01842                            | 0.999562                         | Lsm11                                                                                                                                                                                                                                                                 |
| 17690435              | 7.92                               | 8.03                                | -1.08                                     | -0.111031          | 0.022923                           | 0.999562                         | Zfp518b                                                                                                                                                                                                                                                               |
| 17730641              | 8.32                               | 8.43                                | -1.08                                     | -0.111031          | 0.026101                           | 0.999562                         | Gse1                                                                                                                                                                                                                                                                  |
| 17882193              | 6                                  | 6.11                                | -1.08                                     | -0.111031          | 0.02705                            | 0.999562                         | LOC688318; Cyp27b1; Chchd2; LOC684871; Fabp5; Lce1l; Lsm2; LOC100362916; LOC682812; LOC684372; LOC100366231; LOC682352; LOC100910788; LOC501317; LOC684892; LOC100909462; LOC689635; LOC100909409; LOC100911002; LOC100910163; LOC100911516; RGD1561986; rno-mir-3584 |
| 17853371              | 4.65                               | 4.77                                | -1.08                                     | -0.111031          | 0.029428                           | 0.999562                         | lqch                                                                                                                                                                                                                                                                  |
| 17733304              | 9.93                               | 10.05                               | -1.08                                     | -0.111031          | 0.031098                           | 0.999562                         | Smpd3                                                                                                                                                                                                                                                                 |
| 17777757              | 7.03                               | 7.14                                | -1.08                                     | -0.111031          | 0.033124                           | 0.999562                         | Kif16b                                                                                                                                                                                                                                                                |
| 17881547              | 6.67                               | 6.78                                | -1.08                                     | -0.111031          | 0.033357                           | 0.999562                         | LOC688318; Cyp27b1; Chchd2; LOC684871; Fabp5; Lce1l; Lsm2; LOC100362916; LOC682812; LOC684372; LOC100366231; LOC682352; LOC100910788; LOC501317; LOC684892; LOC100909462; LOC689635; LOC100909409; LOC100911002; LOC100910163; LOC100911516; RGD1561986; rno-mir-3584 |

| Transcript Cluster ID | Injury Bi-weight Avg Signal (log2) | Control Bi-weight Avg Signal (log2) | Fold Change (linear) (Injury vs. Control) | Fold Change (log2) | ANOVA p-value (Injury vs. Control) | FDR p-value (Injury vs. Control) | Gene Symbol                                                                                                                                                                                                                                                           |
|-----------------------|------------------------------------|-------------------------------------|-------------------------------------------|--------------------|------------------------------------|----------------------------------|-----------------------------------------------------------------------------------------------------------------------------------------------------------------------------------------------------------------------------------------------------------------------|
| 17729655              | 8.27                               | 8.37                                | -1.08                                     | -0.111031          | 0.035852                           | 0.999562                         | Slc7a6                                                                                                                                                                                                                                                                |
| 17660607              | 8.33                               | 8.44                                | -1.08                                     | -0.111031          | 0.036198                           | 0.999562                         | Pcgf2; LOC681958                                                                                                                                                                                                                                                      |
| 17622317              | 8.03                               | 8.14                                | -1.08                                     | -0.111031          | 0.037541                           | 0.999562                         | Tspan4; LOC100911766                                                                                                                                                                                                                                                  |
| 17881825              | 6.72                               | 6.83                                | -1.08                                     | -0.111031          | 0.038424                           | 0.999562                         | LOC688318; Cyp27b1; Chchd2; LOC684871; Fabp5; Lce1l; Lsm2; LOC100362916; LOC682812; LOC684372; LOC100366231; LOC682352; LOC100910788; LOC501317; LOC684892; LOC100909462; LOC689635; LOC100909409; LOC100911002; LOC100910163; LOC100911516; RGD1561986; rno-mir-3584 |
| 17667162              | 9.57                               | 9.68                                | -1.08                                     | -0.111031          | 0.040787                           | 0.999562                         | Pi4ka                                                                                                                                                                                                                                                                 |
| 17653311              | 9.45                               | 9.56                                | -1.08                                     | -0.111031          | 0.048538                           | 0.999562                         | Hgs                                                                                                                                                                                                                                                                   |
| 17739281              | 6.15                               | 6.26                                | -1.08                                     | -0.111031          | 0.049203                           | 0.999562                         | Fam198b                                                                                                                                                                                                                                                               |
| 17861093              | 8.62                               | 8.75                                | -1.09                                     | -0.124328          | 0.001667                           | 0.999562                         | Dis3l2                                                                                                                                                                                                                                                                |
| 17802419              | 6.67                               | 6.79                                | -1.09                                     | -0.124328          | 0.007526                           | 0.999562                         | Sync                                                                                                                                                                                                                                                                  |
| 17738403              | 8.51                               | 8.63                                | -1.09                                     | -0.124328          | 0.012895                           | 0.999562                         | Ccrn4l                                                                                                                                                                                                                                                                |
| 17801737              | 6.75                               | 6.88                                | -1.09                                     | -0.124328          | 0.013568                           | 0.999562                         | Cited4                                                                                                                                                                                                                                                                |
| 17833575              | 8.84                               | 8.96                                | -1.09                                     | -0.124328          | 0.017975                           | 0.999562                         | Sppl2b                                                                                                                                                                                                                                                                |
| 17695125              | 8.31                               | 8.43                                | -1.09                                     | -0.124328          | 0.018517                           | 0.999562                         | Jakmip1                                                                                                                                                                                                                                                               |
| 17692728              | 8.12                               | 8.24                                | -1.09                                     | -0.124328          | 0.019542                           | 0.999562                         | Lrrc8d                                                                                                                                                                                                                                                                |
| 17812744              | 7.91                               | 8.03                                | -1.09                                     | -0.124328          | 0.021935                           | 0.999562                         | Pex14                                                                                                                                                                                                                                                                 |
| 17731019              | 8.38                               | 8.51                                | -1.09                                     | -0.124328          | 0.025528                           | 0.999562                         | Gas8                                                                                                                                                                                                                                                                  |
| 17632953              | 6.93                               | 7.05                                | -1.09                                     | -0.124328          | 0.025622                           | 0.999562                         | Spaca4                                                                                                                                                                                                                                                                |
| 17838221              | 5.67                               | 5.79                                | -1.09                                     | -0.124328          | 0.02968                            | 0.999562                         | Ly6c; LOC100911104; LOC100912078                                                                                                                                                                                                                                      |
| 17799518              | 5.1                                | 5.23                                | -1.09                                     | -0.124328          | 0.034083                           | 0.999562                         | Tyrp1                                                                                                                                                                                                                                                                 |
| 17715650              | 8.68                               | 8.81                                | -1.09                                     | -0.124328          | 0.042189                           | 0.999562                         | Lrrc16a                                                                                                                                                                                                                                                               |
| 17856014              | 6.39                               | 6.51                                | -1.09                                     | -0.124328          | 0.04294                            | 0.999562                         | Pth1r                                                                                                                                                                                                                                                                 |
| 17861509              | 5.6                                | 5.72                                | -1.09                                     | -0.124328          | 0.045701                           | 0.999562                         | Mlph                                                                                                                                                                                                                                                                  |
| 17651061              | 5.36                               | 5.49                                | -1.09                                     | -0.124328          | 0.046516                           | 0.999562                         | Kihl10                                                                                                                                                                                                                                                                |
| 17882457              | 5.89                               | 6.02                                | -1.09                                     | -0.124328          | 0.049998                           | 0.999562                         | LOC688318; Cyp27b1; Chchd2; LOC684871; Fabp5; Lce1l; Lsm2; LOC100362916; LOC682812; LOC684372; LOC100366231; LOC682352; LOC100910788; LOC501317; LOC684892; LOC100909462; LOC689635; LOC100909409; LOC100911002; LOC100910163; LOC100911516; RGD1561986; rno-mir-3584 |
| 17762887              | 9.25                               | 9.38                                | -1.1                                      | -0.137504          | 0.003042                           | 0.999562                         | Dlx1                                                                                                                                                                                                                                                                  |
| 17818030              | 9.35                               | 9.49                                | -1.1                                      | -0.137504          | 0.004406                           | 0.999562                         | Unc79                                                                                                                                                                                                                                                                 |
| 17706586              | 7.19                               | 7.33                                | -1.1                                      | -0.137504          | 0.007469                           | 0.999562                         | Grid1                                                                                                                                                                                                                                                                 |
| 17708097              | 3.85                               | 3.99                                | -1.1                                      | -0.137504          | 0.009306                           | 0.999562                         | Fgl1                                                                                                                                                                                                                                                                  |
| 17625649              | 4.89                               | 5.02                                | -1.1                                      | -0.137504          | 0.011141                           | 0.999562                         | Hpse2                                                                                                                                                                                                                                                                 |
| 17716754              | 3.55                               | 3.68                                | -1.1                                      | -0.137504          | 0.012853                           | 0.999562                         | Akr1c3                                                                                                                                                                                                                                                                |
| 17841442              | 5.27                               | 5.41                                | -1.1                                      | -0.137504          | 0.013116                           | 0.999562                         | Krt78                                                                                                                                                                                                                                                                 |
| 17765197              | 7.98                               | 8.12                                | -1.1                                      | -0.137504          | 0.015925                           | 0.999562                         | Mapkbp1                                                                                                                                                                                                                                                               |
| 17832737              | 4.33                               | 4.46                                | -1.1                                      | -0.137504          | 0.01866                            | 0.999562                         | Hoxc5                                                                                                                                                                                                                                                                 |
| 17878135              | 5.62                               | 5.76                                | -1.1                                      | -0.137504          | 0.021004                           | 0.999562                         | Cxcr3                                                                                                                                                                                                                                                                 |
| 17827384              | 7.46                               | 7.59                                | -1.1                                      | -0.137504          | 0.021058                           | 0.999562                         | Nup37                                                                                                                                                                                                                                                                 |
| 17799278              | 7.42                               | 7.55                                | -1.1                                      | -0.137504          | 0.026823                           | 0.999562                         | Col27a1                                                                                                                                                                                                                                                               |
| 17723564              | 6.2                                | 6.33                                | -1.1                                      | -0.137504          | 0.027822                           | 0.999562                         | Cd74                                                                                                                                                                                                                                                                  |
| 17745609              | 4.39                               | 4.53                                | -1.1                                      | -0.137504          | 0.032004                           | 0.999562                         | Card6                                                                                                                                                                                                                                                                 |
| 17839341              | 3.6                                | 3.74                                | -1.1                                      | -0.137504          | 0.036287                           | 0.999562                         | Dnajb7                                                                                                                                                                                                                                                                |
| 17850063              | 8.25                               | 8.4                                 | -1.1                                      | -0.137504          | 0.040307                           | 0.999562                         | Zfp426                                                                                                                                                                                                                                                                |
| 17821455              | 5.07                               | 5.21                                | -1.1                                      | -0.137504          | 0.041174                           | 0.999562                         | Slc26a4                                                                                                                                                                                                                                                               |
| 17627542              | 6.59                               | 6.73                                | -1.1                                      | -0.137504          | 0.045065                           | 0.999562                         | RGD1560020_predicted                                                                                                                                                                                                                                                  |
| 17627955              | 8.6                                | 8.75                                | -1.11                                     | -0.15056           | 0.000531                           | 0.897373                         | Brd9                                                                                                                                                                                                                                                                  |
| 17852970              | 8.81                               | 8.96                                | -1.11                                     | -0.15056           | 0.010686                           | 0.999562                         | Csk                                                                                                                                                                                                                                                                   |
| 17652634              | 7.23                               | 7.39                                | -1.11                                     | -0.15056           | 0.013105                           | 0.999562                         | Armc7                                                                                                                                                                                                                                                                 |
| 17720573              | 6.93                               | 7.08                                | -1.11                                     | -0.15056           | 0.013174                           | 0.999562                         | Ankrd16                                                                                                                                                                                                                                                               |
| 17765071              | 6.05                               | 6.2                                 | -1.11                                     | -0.15056           | 0.014601                           | 0.999562                         | Dll4                                                                                                                                                                                                                                                                  |
| 17626143              | 7.42                               | 7.57                                | -1.11                                     | -0.15056           | 0.01989                            | 0.999562                         | Fbxl15                                                                                                                                                                                                                                                                |
| 17790424              | 9.49                               | 9.64                                | -1.11                                     | -0.15056           | 0.020733                           | 0.999562                         | Plxna4a                                                                                                                                                                                                                                                               |
| 17864208              | 6.71                               | 6.86                                | -1.11                                     | -0.15056           | 0.022111                           | 0.999562                         | Tex30                                                                                                                                                                                                                                                                 |
| 17856061              | 8.11                               | 8.25                                | -1.11                                     | -0.15056           | 0.023442                           | 0.999562                         | Mlh1                                                                                                                                                                                                                                                                  |
| 17635910              | 4.79                               | 4.94                                | -1.11                                     | -0.15056           | 0.028572                           | 0.999562                         | Olr208                                                                                                                                                                                                                                                                |
| 17797076              | 9.99                               | 10.15                               | -1.11                                     | -0.15056           | 0.035806                           | 0.999562                         | Xkr4                                                                                                                                                                                                                                                                  |
| 17812762              | 8.01                               | 8.15                                | -1.11                                     | -0.15056           | 0.036652                           | 0.999562                         | Apitd1; Cort; Kif1b; LOC100360180                                                                                                                                                                                                                                     |

| Transcript Cluster ID | Injury Bi-weight Avg Signal (log2) | Control Bi-weight Avg Signal (log2) | Fold Change (linear) (Injury vs. Control) | Fold Change (log2) | ANOVA p-value (Injury vs. Control) | FDR p-value (Injury vs. Control) | Gene Symbol                                                                                                                                                                                                                                                           |
|-----------------------|------------------------------------|-------------------------------------|-------------------------------------------|--------------------|------------------------------------|----------------------------------|-----------------------------------------------------------------------------------------------------------------------------------------------------------------------------------------------------------------------------------------------------------------------|
| 17712212              | 4                                  | 4.15                                | -1.11                                     | -0.15056           | 0.037713                           | 0.999562                         | Poteg                                                                                                                                                                                                                                                                 |
| 17635598              | 4.22                               | 4.37                                | -1.11                                     | -0.15056           | 0.042784                           | 0.999562                         | Olr128                                                                                                                                                                                                                                                                |
| 17722664              | 5.55                               | 5.69                                | -1.11                                     | -0.15056           | 0.047349                           | 0.999562                         | Pcdhb11                                                                                                                                                                                                                                                               |
| 17667134              | 7.77                               | 7.94                                | -1.12                                     | -0.163499          | 0.007439                           | 0.999562                         | Slc7a4                                                                                                                                                                                                                                                                |
| 17646195              | 5.51                               | 5.68                                | -1.12                                     | -0.163499          | 0.008873                           | 0.999562                         | Olr1437; LOC100911223                                                                                                                                                                                                                                                 |
| 17770130              | 5.89                               | 6.06                                | -1.12                                     | -0.163499          | 0.015396                           | 0.999562                         | Noxa1                                                                                                                                                                                                                                                                 |
| 17827749              | 8.39                               | 8.55                                | -1.12                                     | -0.163499          | 0.015486                           | 0.999562                         | Eea1                                                                                                                                                                                                                                                                  |
| 17767857              | 6.43                               | 6.6                                 | -1.12                                     | -0.163499          | 0.025224                           | 0.999562                         | RGD1561517                                                                                                                                                                                                                                                            |
| 17882529              | 6.29                               | 6.45                                | -1.12                                     | -0.163499          | 0.027223                           | 0.999562                         | LOC688318; Cyp27b1; Chchd2; LOC684871; Fabp5; Lce1l; Lsm2; LOC100362916; LOC682812; LOC684372; LOC100366231; LOC682352; LOC100910788; LOC501317; LOC684892; LOC100909462; LOC689635; LOC100909409; LOC100911002; LOC100910163; LOC100911516; RGD1561986; rno-mir-3584 |
| 17722661              | 7.66                               | 7.83                                | -1.12                                     | -0.163499          | 0.0291                             | 0.999562                         | Pcdhb10                                                                                                                                                                                                                                                               |
| 17825882              | 3.64                               | 3.8                                 | -1.12                                     | -0.163499          | 0.030151                           | 0.999562                         | Olr956                                                                                                                                                                                                                                                                |
| 17650508              | 4.77                               | 4.94                                | -1.12                                     | -0.163499          | 0.030349                           | 0.999562                         | Hoxb13                                                                                                                                                                                                                                                                |
| 17622552              | 4.72                               | 4.89                                | -1.12                                     | -0.163499          | 0.032663                           | 0.999562                         | Slc22a18                                                                                                                                                                                                                                                              |
| 17882243              | 6.09                               | 6.25                                | -1.12                                     | -0.163499          | 0.032783                           | 0.999562                         | LOC688318; Cyp27b1; Chchd2; LOC684871; Fabp5; Lce1l; Lsm2; LOC100362916; LOC682812; LOC684372; LOC100366231; LOC682352; LOC100910788; LOC501317; LOC684892; LOC100909462; LOC689635; LOC100909409; LOC100911002; LOC100910163; LOC100911516; RGD1561986; rno-mir-3584 |
| 17677600              | 7.54                               | 7.7                                 | -1.12                                     | -0.163499          | 0.037361                           | 0.999562                         | Snrnp35                                                                                                                                                                                                                                                               |
| 17791731              | 4.17                               | 4.33                                | -1.12                                     | -0.163499          | 0.0394                             | 0.999562                         | Vom1r89                                                                                                                                                                                                                                                               |
| 17882479              | 7.97                               | 8.14                                | -1.12                                     | -0.163499          | 0.042896                           | 0.999562                         | LOC688318; Cyp27b1; Chchd2; LOC684871; Fabp5; Lce1l; Lsm2; LOC100362916; LOC682812; LOC684372; LOC100366231; LOC682352; LOC100910788; LOC501317; LOC684892; LOC100909462; LOC689635; LOC100909409; LOC100911002; LOC100910163; LOC100911516; RGD1561986; rno-mir-3584 |
| 17753559              | 5.28                               | 5.44                                | -1.12                                     | -0.163499          | 0.044233                           | 0.999562                         | Armc12                                                                                                                                                                                                                                                                |
| 17789837              | 5.45                               | 5.63                                | -1.13                                     | -0.176323          | 0.006861                           | 0.999562                         | Tfec                                                                                                                                                                                                                                                                  |
| 17881501              | 4.38                               | 4.56                                | -1.13                                     | -0.176323          | 0.009414                           | 0.999562                         | LOC688318; Cyp27b1; Chchd2; LOC684871; Fabp5; Lce1l; Lsm2; LOC100362916; LOC682812; LOC684372; LOC100366231; LOC682352; LOC100910788; LOC501317; LOC684892; LOC100909462; LOC689635; LOC100909409; LOC100911002; LOC100910163; LOC100911516; RGD1561986; rno-mir-3584 |
| 17737321              | 6.28                               | 6.46                                | -1.13                                     | -0.176323          | 0.009711                           | 0.999562                         | Mir124-2; rno-mir-124-2                                                                                                                                                                                                                                               |
| 17789975              | 6.38                               | 6.56                                | -1.13                                     | -0.176323          | 0.013234                           | 0.999562                         | Fezf1                                                                                                                                                                                                                                                                 |
| 17752741              | 5.48                               | 5.67                                | -1.13                                     | -0.176323          | 0.013776                           | 0.999562                         | Lta                                                                                                                                                                                                                                                                   |
| 17881975              | 6.81                               | 6.98                                | -1.13                                     | -0.176323          | 0.014017                           | 0.999562                         | LOC688318; Cyp27b1; Chchd2; LOC684871; Fabp5; Lce1l; Lsm2; LOC100362916; LOC682812; LOC684372; LOC100366231; LOC682352; LOC100910788; LOC501317; LOC684892; LOC100909462; LOC689635; LOC100909409; LOC100911002; LOC100910163; LOC100911516; RGD1561986; rno-mir-3584 |
| 17798739              | 7.58                               | 7.75                                | -1.13                                     | -0.176323          | 0.02002                            | 0.999562                         | Stx17                                                                                                                                                                                                                                                                 |
| 17627579              | 3.33                               | 3.5                                 | -1.13                                     | -0.176323          | 0.021155                           | 0.999562                         | RGD1560849                                                                                                                                                                                                                                                            |
| 17723683              | 6.23                               | 6.41                                | -1.13                                     | -0.176323          | 0.024079                           | 0.999562                         | Ii17b                                                                                                                                                                                                                                                                 |
| 17748210              | 3.7                                | 3.87                                | -1.13                                     | -0.176323          | 0.026053                           | 0.999562                         | Tdo2                                                                                                                                                                                                                                                                  |
| 17699381              | 8.4                                | 8.58                                | -1.13                                     | -0.176323          | 0.030296                           | 0.999562                         | Shisa2                                                                                                                                                                                                                                                                |
| 17818335              | 6.05                               | 6.22                                | -1.13                                     | -0.176323          | 0.039344                           | 0.999562                         | Mir342; rno-mir-342                                                                                                                                                                                                                                                   |
| 17760924              | 7.16                               | 7.34                                | -1.13                                     | -0.176323          | 0.047303                           | 0.999562                         | Endog                                                                                                                                                                                                                                                                 |
| 17613652              | 8.94                               | 9.12                                | -1.14                                     | -0.189034          | 0.011531                           | 0.999562                         | Tmem160                                                                                                                                                                                                                                                               |
| 17702684              | 7.74                               | 7.93                                | -1.14                                     | -0.189034          | 0.012452                           | 0.999562                         | Cdh24                                                                                                                                                                                                                                                                 |
| 17623111              | 8.09                               | 8.28                                | -1.14                                     | -0.189034          | 0.013732                           | 0.999562                         | Bles03                                                                                                                                                                                                                                                                |
| 17652713              | 6.7                                | 6.89                                | -1.14                                     | -0.189034          | 0.01893                            | 0.999562                         | Tsen54                                                                                                                                                                                                                                                                |
| 17847663              | 5.24                               | 5.43                                | -1.14                                     | -0.189034          | 0.019377                           | 0.999562                         | Mst1                                                                                                                                                                                                                                                                  |

| Transcript Cluster ID | Injury Bi-weight Avg Signal (log2) | Control Bi-weight Avg Signal (log2) | Fold Change (linear) (Injury vs. Control) | Fold Change (log2) | ANOVA p-value (Injury vs. Control) | FDR p-value (Injury vs. Control) | Gene Symbol                                                                                                                                                                                                                                                            |
|-----------------------|------------------------------------|-------------------------------------|-------------------------------------------|--------------------|------------------------------------|----------------------------------|------------------------------------------------------------------------------------------------------------------------------------------------------------------------------------------------------------------------------------------------------------------------|
| 17675782              | 7.86                               | 8.05                                | -1.14                                     | -0.189034          | 0.021666                           | 0.999562                         | Zkscan5                                                                                                                                                                                                                                                                |
| 17675570              | 5.67                               | 5.86                                | -1.14                                     | -0.189034          | 0.025101                           | 0.999562                         | Tex26                                                                                                                                                                                                                                                                  |
| 17613711              | 7.59                               | 7.78                                | -1.14                                     | -0.189034          | 0.036669                           | 0.999562                         | Prkd2                                                                                                                                                                                                                                                                  |
| 17873839              | 6.74                               | 6.93                                | -1.14                                     | -0.189034          | 0.037632                           | 0.999562                         | Cenpi                                                                                                                                                                                                                                                                  |
| 17640763              | 5.04                               | 5.22                                | -1.14                                     | -0.189034          | 0.038486                           | 0.999562                         | Plac1l                                                                                                                                                                                                                                                                 |
| 17826222              | 7.76                               | 7.94                                | -1.14                                     | -0.189034          | 0.044327                           | 0.999562                         | Lingo3                                                                                                                                                                                                                                                                 |
| 17624335              | 3.46                               | 3.66                                | -1.15                                     | -0.201634          | 0.002856                           | 0.999562                         | Olr348                                                                                                                                                                                                                                                                 |
| 17737825              | 8                                  | 8.2                                 | -1.15                                     | -0.201634          | 0.006105                           | 0.999562                         | LOC100912162                                                                                                                                                                                                                                                           |
| 17848680              | 6.87                               | 7.07                                | -1.15                                     | -0.201634          | 0.011533                           | 0.999562                         | Ctdspl                                                                                                                                                                                                                                                                 |
| 17730478              | 7.37                               | 7.57                                | -1.15                                     | -0.201634          | 0.011628                           | 0.999562                         | LOC690350                                                                                                                                                                                                                                                              |
| 17880257              | 5.89                               | 6.09                                | -1.15                                     | -0.201634          | 0.014659                           | 0.999562                         | RGD1560412                                                                                                                                                                                                                                                             |
| 17726365              | 6.4                                | 6.61                                | -1.15                                     | -0.201634          | 0.014907                           | 0.999562                         | Fbn2                                                                                                                                                                                                                                                                   |
| 17670074              | 4.77                               | 4.97                                | -1.15                                     | -0.201634          | 0.015092                           | 0.999562                         | Rtp4                                                                                                                                                                                                                                                                   |
| 17801650              | 6.5                                | 6.7                                 | -1.15                                     | -0.201634          | 0.019436                           | 0.999562                         | Zmynd12                                                                                                                                                                                                                                                                |
| 17848419              | 5.02                               | 5.23                                | -1.15                                     | -0.201634          | 0.024628                           | 0.999562                         | Dclk3                                                                                                                                                                                                                                                                  |
| 17742029              | 6.86                               | 7.06                                | -1.15                                     | -0.201634          | 0.028089                           | 0.999562                         | Vav3                                                                                                                                                                                                                                                                   |
| 17752416              | 7.63                               | 7.83                                | -1.15                                     | -0.201634          | 0.03441                            | 0.999562                         | Rpp21                                                                                                                                                                                                                                                                  |
| 17646399              | 7.54                               | 7.74                                | -1.15                                     | -0.201634          | 0.039762                           | 0.999562                         | Lrrc48                                                                                                                                                                                                                                                                 |
| 17822823              | 9.44                               | 9.64                                | -1.15                                     | -0.201634          | 0.045633                           | 0.999562                         | Tmem229b                                                                                                                                                                                                                                                               |
| 17615098              | 5.82                               | 6.04                                | -1.16                                     | -0.214125          | 0.010308                           | 0.999562                         | Ggn                                                                                                                                                                                                                                                                    |
| 17617432              | 6.94                               | 7.16                                | -1.16                                     | -0.214125          | 0.014224                           | 0.999562                         | Ttc23                                                                                                                                                                                                                                                                  |
| 17760074              | 5                                  | 5.22                                | -1.16                                     | -0.214125          | 0.021963                           | 0.999562                         | RGD1564133                                                                                                                                                                                                                                                             |
| 17810254              | 4.19                               | 4.4                                 | -1.16                                     | -0.214125          | 0.023917                           | 0.999562                         | RGD1560700                                                                                                                                                                                                                                                             |
| 17780256              | 4.67                               | 4.89                                | -1.16                                     | -0.214125          | 0.024143                           | 0.999562                         | RGD1306208                                                                                                                                                                                                                                                             |
| 17882725              | 4.66                               | 4.87                                | -1.16                                     | -0.214125          | 0.028592                           | 0.999562                         | LOC688318; Cyp27b1; Chchd2; LOC684871; Fabbp5; Lce1l; Lsm2; LOC100362916; LOC682812; LOC684372; LOC100366231; LOC682352; LOC100910788; LOC501317; LOC684892; LOC100909462; LOC689635; LOC100909409; LOC100911002; LOC100910163; LOC100911516; RGD1561986; rno-mir-3584 |
| 17764262              | 4.92                               | 5.14                                | -1.16                                     | -0.214125          | 0.034809                           | 0.999562                         | Rag2                                                                                                                                                                                                                                                                   |
| 17633143              | 8.4                                | 8.6                                 | -1.16                                     | -0.214125          | 0.040273                           | 0.999562                         | Sergef                                                                                                                                                                                                                                                                 |
| 17657858              | 4.4                                | 4.61                                | -1.16                                     | -0.214125          | 0.040368                           | 0.999562                         | Slc35g3                                                                                                                                                                                                                                                                |
| 17764628              | 6.62                               | 6.84                                | -1.17                                     | -0.226509          | 0.002342                           | 0.999562                         | RGD1566059                                                                                                                                                                                                                                                             |
| 17762269              | 3.96                               | 4.18                                | -1.17                                     | -0.226509          | 0.011782                           | 0.999562                         | Galnt5                                                                                                                                                                                                                                                                 |
| 17866307              | 5.65                               | 5.88                                | -1.17                                     | -0.226509          | 0.016164                           | 0.999562                         | Dnajb3                                                                                                                                                                                                                                                                 |
| 17781980              | 5.77                               | 5.99                                | -1.17                                     | -0.226509          | 0.046164                           | 0.999562                         | Fam71f1                                                                                                                                                                                                                                                                |
| 17832722              | 3.86                               | 4.08                                | -1.17                                     | -0.226509          | 0.04936                            | 0.999562                         | Mir196a; rno-mir-196a                                                                                                                                                                                                                                                  |
| 17646585              | 6.01                               | 6.25                                | -1.18                                     | -0.238787          | 0.000097                           | 0.832906                         | Aldh3a1                                                                                                                                                                                                                                                                |
| 17878255              | 5.36                               | 5.6                                 | -1.18                                     | -0.238787          | 0.01273                            | 0.999562                         | RGD1564124                                                                                                                                                                                                                                                             |
| 17647306              | 5.7                                | 5.94                                | -1.18                                     | -0.238787          | 0.015396                           | 0.999562                         | Slc25a35                                                                                                                                                                                                                                                               |
| 17630465              | 5.47                               | 5.71                                | -1.18                                     | -0.238787          | 0.018793                           | 0.999562                         | Tescl                                                                                                                                                                                                                                                                  |
| 17879619              | 3.28                               | 3.52                                | -1.18                                     | -0.238787          | 0.021179                           | 0.999562                         | Mir743b; rno-mir-743b                                                                                                                                                                                                                                                  |
| 17657398              | 7.44                               | 7.68                                | -1.18                                     | -0.238787          | 0.025488                           | 0.999562                         | Ntn1                                                                                                                                                                                                                                                                   |
| 17787649              | 3.46                               | 3.7                                 | -1.18                                     | -0.238787          | 0.029019                           | 0.999562                         | Tas2r145                                                                                                                                                                                                                                                               |
| 17778164              | 5.11                               | 5.36                                | -1.18                                     | -0.238787          | 0.0294                             | 0.999562                         | Vsx1                                                                                                                                                                                                                                                                   |
| 17850348              | 6.78                               | 7.02                                | -1.18                                     | -0.238787          | 0.03161                            | 0.999562                         | Spc24                                                                                                                                                                                                                                                                  |
| 17755055              | 5.44                               | 5.67                                | -1.18                                     | -0.238787          | 0.038644                           | 0.999562                         | Neurog3                                                                                                                                                                                                                                                                |
| 17838768              | 6.03                               | 6.27                                | -1.18                                     | -0.238787          | 0.040682                           | 0.999562                         | Foxh1                                                                                                                                                                                                                                                                  |
| 17611264              | 5.86                               | 6.1                                 | -1.19                                     | -0.250962          | 0.007457                           | 0.999562                         | Zfp72                                                                                                                                                                                                                                                                  |
| 17640353              | 4.01                               | 4.26                                | -1.19                                     | -0.250962          | 0.013533                           | 0.999562                         | LOC686411                                                                                                                                                                                                                                                              |
| 17883147              | 6.96                               | 7.21                                | -1.19                                     | -0.250962          | 0.019198                           | 0.999562                         | LOC688318; Cyp27b1; Chchd2; LOC684871; Fabbp5; Lce1l; Lsm2; LOC100362916; LOC682812; LOC684372; LOC100366231; LOC682352; LOC100910788; LOC501317; LOC684892; LOC100909462; LOC689635; LOC100909409; LOC100911002; LOC100910163; LOC100911516; RGD1561986; rno-mir-3584 |
| 17702025              | 4.96                               | 5.22                                | -1.19                                     | -0.250962          | 0.022155                           | 0.999562                         | Rnase9                                                                                                                                                                                                                                                                 |
| 17709283              | 3.99                               | 4.25                                | -1.19                                     | -0.250962          | 0.029894                           | 0.999562                         | Adprhl1; Grtp1                                                                                                                                                                                                                                                         |
| 17638165              | 5.92                               | 6.17                                | -1.19                                     | -0.250962          | 0.030342                           | 0.999562                         | Olr288                                                                                                                                                                                                                                                                 |
| 17723575              | 5.22                               | 5.47                                | -1.19                                     | -0.250962          | 0.030495                           | 0.999562                         | Arsi                                                                                                                                                                                                                                                                   |
| 17872922              | 4.64                               | 4.89                                | -1.19                                     | -0.250962          | 0.045879                           | 0.999562                         | Pgr15l                                                                                                                                                                                                                                                                 |
| 17613764              | 5.13                               | 5.38                                | -1.19                                     | -0.250962          | 0.046158                           | 0.999562                         | Cgm4                                                                                                                                                                                                                                                                   |
| 17618416              | 7.09                               | 7.35                                | -1.19                                     | -0.250962          | 0.048962                           | 0.999562                         | RGD1562118                                                                                                                                                                                                                                                             |

| Transcript Cluster ID | Injury Bi-weight Avg Signal (log2) | Control Bi-weight Avg Signal (log2) | Fold Change (linear) (Injury vs. Control) | Fold Change (log2) | ANOVA p-value (Injury vs. Control) | FDR p-value (Injury vs. Control) | Gene Symbol                                                                                                                                                                                                                                                           |
|-----------------------|------------------------------------|-------------------------------------|-------------------------------------------|--------------------|------------------------------------|----------------------------------|-----------------------------------------------------------------------------------------------------------------------------------------------------------------------------------------------------------------------------------------------------------------------|
| 17662434              | 5.43                               | 5.69                                | -1.2                                      | -0.263034          | 0.003906                           | 0.999562                         | Gh1                                                                                                                                                                                                                                                                   |
| 17695587              | 5.19                               | 5.46                                | -1.2                                      | -0.263034          | 0.010222                           | 0.999562                         | Slc5a1                                                                                                                                                                                                                                                                |
| 17806341              | 5.48                               | 5.74                                | -1.2                                      | -0.263034          | 0.019079                           | 0.999562                         | RGD1563056                                                                                                                                                                                                                                                            |
| 17746204              | 2.61                               | 2.87                                | -1.2                                      | -0.263034          | 0.019131                           | 0.999562                         | Sirpb2                                                                                                                                                                                                                                                                |
| 17837374              | 6.01                               | 6.27                                | -1.2                                      | -0.263034          | 0.037413                           | 0.999562                         | Dscc1                                                                                                                                                                                                                                                                 |
| 17720596              | 4.74                               | 5.02                                | -1.21                                     | -0.275007          | 0.030947                           | 0.999562                         | Il2ra                                                                                                                                                                                                                                                                 |
| 17806775              | 5                                  | 5.28                                | -1.21                                     | -0.275007          | 0.04279                            | 0.999562                         | Cd72                                                                                                                                                                                                                                                                  |
| 17613011              | 7.12                               | 7.39                                | -1.21                                     | -0.275007          | 0.049261                           | 0.999562                         | Zfp579                                                                                                                                                                                                                                                                |
| 17640644              | 5.97                               | 6.26                                | -1.22                                     | -0.286881          | 0.001559                           | 0.999562                         | Ms4a8                                                                                                                                                                                                                                                                 |
| 17770759              | 7.7                                | 7.99                                | -1.22                                     | -0.286881          | 0.014427                           | 0.999562                         | Abo                                                                                                                                                                                                                                                                   |
| 17658394              | 6.24                               | 6.52                                | -1.22                                     | -0.286881          | 0.01755                            | 0.999562                         | Smtnl2                                                                                                                                                                                                                                                                |
| 17649345              | 6.36                               | 6.65                                | -1.22                                     | -0.286881          | 0.018717                           | 0.999562                         | Rnf135                                                                                                                                                                                                                                                                |
| 17703435              | 3.77                               | 4.06                                | -1.22                                     | -0.286881          | 0.027413                           | 0.999562                         | RGD1563302                                                                                                                                                                                                                                                            |
| 17871605              | 5.31                               | 5.59                                | -1.22                                     | -0.286881          | 0.028331                           | 0.999562                         | LOC681355; LOC683430                                                                                                                                                                                                                                                  |
| 17645229              | 7.77                               | 8.05                                | -1.22                                     | -0.286881          | 0.034384                           | 0.999562                         | Fncd9                                                                                                                                                                                                                                                                 |
| 17662478              | 5.11                               | 5.4                                 | -1.22                                     | -0.286881          | 0.046112                           | 0.999562                         | Icam2                                                                                                                                                                                                                                                                 |
| 17789491              | 4.11                               | 4.42                                | -1.23                                     | -0.298658          | 0.016281                           | 0.999562                         | Hepacam2                                                                                                                                                                                                                                                              |
| 17624498              | 5.16                               | 5.45                                | -1.23                                     | -0.298658          | 0.023495                           | 0.999562                         | Aldh1a1                                                                                                                                                                                                                                                               |
| 17881819              | 4.97                               | 5.28                                | -1.23                                     | -0.298658          | 0.036618                           | 0.999562                         | LOC688318; Cyp27b1; Chchd2; LOC684871; Fabp5; Lce1l; Lsm2; LOC100362916; LOC682812; LOC684372; LOC100366231; LOC682352; LOC100910788; LOC501317; LOC684892; LOC100909462; LOC689635; LOC100909409; LOC100911002; LOC100910163; LOC100911516; RGD1561986; rno-mir-3584 |
| 17613328              | 3.55                               | 3.85                                | -1.24                                     | -0.31034           | 0.020359                           | 0.999562                         | Vom1r51; LOC100364634                                                                                                                                                                                                                                                 |
| 17642959              | 5.34                               | 5.65                                | -1.24                                     | -0.31034           | 0.026502                           | 0.999562                         | Nrap                                                                                                                                                                                                                                                                  |
| 17846461              | 5.1                                | 5.43                                | -1.25                                     | -0.321928          | 0.000188                           | 0.876358                         | Trim43a                                                                                                                                                                                                                                                               |
| 17632333              | 5.17                               | 5.51                                | -1.26                                     | -0.333424          | 0.015071                           | 0.999562                         | Klk1c2                                                                                                                                                                                                                                                                |
| 17834465              | 5.16                               | 5.49                                | -1.26                                     | -0.333424          | 0.026185                           | 0.999562                         | RGD1564285                                                                                                                                                                                                                                                            |
| 17635918              | 5.3                                | 5.63                                | -1.26                                     | -0.333424          | 0.036144                           | 0.999562                         | Olr217                                                                                                                                                                                                                                                                |
| 17881481              | 2.37                               | 2.7                                 | -1.26                                     | -0.333424          | 0.038171                           | 0.999562                         | LOC688318; Cyp27b1; Chchd2; LOC684871; Fabp5; Lce1l; Lsm2; LOC100362916; LOC682812; LOC684372; LOC100366231; LOC682352; LOC100910788; LOC501317; LOC684892; LOC100909462; LOC689635; LOC100909409; LOC100911002; LOC100910163; LOC100911516; RGD1561986; rno-mir-3584 |
| 17829999              | 6.66                               | 7                                   | -1.27                                     | -0.344828          | 0.001368                           | 0.999562                         | Tigd5                                                                                                                                                                                                                                                                 |
| 17855604              | 3.85                               | 4.2                                 | -1.27                                     | -0.344828          | 0.008708                           | 0.999562                         | Gnat1                                                                                                                                                                                                                                                                 |
| 17656467              | 2.64                               | 2.99                                | -1.27                                     | -0.344828          | 0.018523                           | 0.999562                         | Olr1418                                                                                                                                                                                                                                                               |
| 17855866              | 5.69                               | 6.03                                | -1.27                                     | -0.344828          | 0.033134                           | 0.999562                         | Camp                                                                                                                                                                                                                                                                  |
| 17807275              | 2.14                               | 2.48                                | -1.27                                     | -0.344828          | 0.036952                           | 0.999562                         | Olr850                                                                                                                                                                                                                                                                |
| 17613125              | 5.51                               | 5.87                                | -1.28                                     | -0.356144          | 0.01924                            | 0.999562                         | Tmem86b                                                                                                                                                                                                                                                               |
| 17881545              | 6.35                               | 6.71                                | -1.28                                     | -0.356144          | 0.033797                           | 0.999562                         | LOC688318; Cyp27b1; Chchd2; LOC684871; Fabp5; Lce1l; Lsm2; LOC100362916; LOC682812; LOC684372; LOC100366231; LOC682352; LOC100910788; LOC501317; LOC684892; LOC100909462; LOC689635; LOC100909409; LOC100911002; LOC100910163; LOC100911516; RGD1561986; rno-mir-3584 |
| 17664603              | 5.7                                | 6.06                                | -1.28                                     | -0.356144          | 0.038711                           | 0.999562                         | Mrap                                                                                                                                                                                                                                                                  |
| 17805286              | 3.37                               | 3.74                                | -1.29                                     | -0.367371          | 0.011564                           | 0.999562                         | Xkr9                                                                                                                                                                                                                                                                  |
| 17764646              | 4.14                               | 4.51                                | -1.29                                     | -0.367371          | 0.023199                           | 0.999562                         | Olr786; Olr796; LOC100909613                                                                                                                                                                                                                                          |
| 17843409              | 3.57                               | 3.94                                | -1.29                                     | -0.367371          | 0.04919                            | 0.999562                         | Olr1329                                                                                                                                                                                                                                                               |
| 17614445              | 7.34                               | 7.71                                | -1.3                                      | -0.378512          | 0.01824                            | 0.999562                         | 4732471J01Rik                                                                                                                                                                                                                                                         |
| 17818691              | 6.75                               | 7.13                                | -1.3                                      | -0.378512          | 0.025911                           | 0.999562                         | Mir3576; Mir539; rno-mir-3576; rno-mir-539                                                                                                                                                                                                                            |
| 17787401              | 5.38                               | 5.75                                | -1.3                                      | -0.378512          | 0.037561                           | 0.999562                         | Akap3                                                                                                                                                                                                                                                                 |
| 17775517              | 5.11                               | 5.51                                | -1.31                                     | -0.389567          | 0.022797                           | 0.999562                         | Actc1; Acta2                                                                                                                                                                                                                                                          |
| 17874079              | 4.3                                | 4.69                                | -1.31                                     | -0.389567          | 0.030096                           | 0.999562                         | Il1rapl2                                                                                                                                                                                                                                                              |
| 17841759              | 2.53                               | 2.93                                | -1.32                                     | -0.400538          | 0.001612                           | 0.999562                         | LOC681366                                                                                                                                                                                                                                                             |
| 17880505              | 3.51                               | 3.91                                | -1.32                                     | -0.400538          | 0.019368                           | 0.999562                         | RGD1565369                                                                                                                                                                                                                                                            |
| 17613324              | 2.41                               | 2.82                                | -1.33                                     | -0.411426          | 0.012008                           | 0.999562                         | Vom1r49                                                                                                                                                                                                                                                               |
| 17850002              | 3.79                               | 4.2                                 | -1.33                                     | -0.411426          | 0.032095                           | 0.999562                         | Olr1137; LOC100911893                                                                                                                                                                                                                                                 |
| 17763627              | 1.7                                | 2.1                                 | -1.33                                     | -0.411426          | 0.042695                           | 0.999562                         | Olr526; Olr532                                                                                                                                                                                                                                                        |
| 17687607              | 4.9                                | 5.33                                | -1.34                                     | -0.422233          | 0.014428                           | 0.999562                         | Fam71a                                                                                                                                                                                                                                                                |

| Transcript Cluster ID | Injury Bi-weight Avg Signal (log2) | Control Bi-weight Avg Signal (log2) | Fold Change (linear) (Injury vs. Control) | Fold Change (log2) | ANOVA p-value (Injury vs. Control) | FDR p-value (Injury vs. Control) | Gene Symbol   |
|-----------------------|------------------------------------|-------------------------------------|-------------------------------------------|--------------------|------------------------------------|----------------------------------|---------------|
| 17798915              | 4.87                               | 5.29                                | -1.34                                     | -0.422233          | 0.014541                           | 0.999562                         | Olr848        |
| 17876439              | 5.54                               | 5.96                                | -1.34                                     | -0.422233          | 0.037594                           | 0.999562                         | Mycs          |
| 17635936              | 3.55                               | 3.97                                | -1.34                                     | -0.422233          | 0.047519                           | 0.999562                         | Olr232        |
| 17834268              | 1.91                               | 2.35                                | -1.35                                     | -0.432959          | 0.019018                           | 0.999562                         | LOC687068     |
| 17619051              | 3.34                               | 3.78                                | -1.35                                     | -0.432959          | 0.027538                           | 0.999562                         | Olr53         |
| 17851138              | 2.95                               | 3.38                                | -1.35                                     | -0.432959          | 0.032132                           | 0.999562                         | Olr1195       |
| 17785395              | 2.18                               | 2.61                                | -1.35                                     | -0.432959          | 0.036689                           | 0.999562                         | Vom1r100      |
| 17679465              | 3.44                               | 3.89                                | -1.37                                     | -0.454176          | 0.00779                            | 0.999562                         | Serpib7       |
| 17728532              | 3.67                               | 4.13                                | -1.37                                     | -0.454176          | 0.010372                           | 0.999562                         | LOC367516     |
| 17842229              | 3.48                               | 3.94                                | -1.37                                     | -0.454176          | 0.019451                           | 0.999562                         | Olr1156       |
| 17875457              | 5.25                               | 5.71                                | -1.38                                     | -0.464668          | 0.010359                           | 0.999562                         | Rhox8; Rhox7  |
| 17619038              | 4.91                               | 5.37                                | -1.38                                     | -0.464668          | 0.022547                           | 0.999562                         | Olr46         |
| 17878662              | 5.62                               | 6.09                                | -1.38                                     | -0.464668          | 0.025557                           | 0.999562                         | RGD1561582    |
| 17774387              | 2.92                               | 3.39                                | -1.39                                     | -0.475085          | 0.009096                           | 0.999562                         | Olr735        |
| 17619208              | 2.15                               | 2.62                                | -1.39                                     | -0.475085          | 0.027474                           | 0.999562                         | Olr189        |
| 17805665              | 3.88                               | 4.36                                | -1.4                                      | -0.485427          | 0.005972                           | 0.999562                         | Cyp7a1        |
| 17623944              | 4.49                               | 4.97                                | -1.4                                      | -0.485427          | 0.014898                           | 0.999562                         | Scgb2a2       |
| 17612847              | 5.66                               | 6.15                                | -1.41                                     | -0.495695          | 0.046668                           | 0.999562                         | Vom2r-ps45    |
| 17774158              | 2.91                               | 3.43                                | -1.43                                     | -0.516015          | 0.000114                           | 0.832906                         | Olr510        |
| 17650210              | 5.34                               | 5.9                                 | -1.47                                     | -0.555816          | 0.029316                           | 0.999562                         | LOC100363423  |
| 17661722              | 5.31                               | 5.87                                | -1.48                                     | -0.565597          | 0.046818                           | 0.999562                         | Meox1         |
| 17842868              | 4.67                               | 5.36                                | -1.61                                     | -0.687061          | 0.011343                           | 0.999562                         | LOC100365695  |
| 17813579              | 3.56                               | 4.24                                | -1.61                                     | -0.687061          | 0.026214                           | 0.999562                         | 4921513D11Rik |
| 17635975              | 2.89                               | 3.61                                | -1.64                                     | -0.713696          | 0.020443                           | 0.999562                         | Olr239        |
| 17774178              | 4.23                               | 5.01                                | -1.72                                     | -0.782409          | 0.040001                           | 0.999562                         | Olr531        |
| 17640209              | 2.31                               | 3.22                                | -1.88                                     | -0.910733          | 0.009028                           | 0.999562                         | UST4r; Ust5r  |
| 17749701              | 3.42                               | 4.46                                | -2.05                                     | -1.035624          | 0.0298                             | 0.999562                         | Olr390        |

Supplementary **Table 3**: Cell-cell adhesion transcripts changed 24 h after injury ( $p < 0.1$ ).

| Transcript Cluster ID | Injury Bi-weight Avg Signal (log2) | Control Bi-weight Avg Signal (log2) | Fold Change (linear) (Injury vs. Control) | Fold Change (log2) | ANOVA p-value (Injury vs. Control) | FDR p-value (Injury vs. Control) | Gene Symbol |
|-----------------------|------------------------------------|-------------------------------------|-------------------------------------------|--------------------|------------------------------------|----------------------------------|-------------|
| 17812245              | 9.98                               | 9.76                                | 1.16                                      | 0.2141248          | 0.004167                           | 0.999562                         | Pdpn        |
| 17682462              | 7.79                               | 7.89                                | -1.07                                     | -0.097611          | 0.012102                           | 0.999562                         | Kif26b      |
| 17702684              | 7.74                               | 7.93                                | -1.14                                     | -0.189034          | 0.012452                           | 0.999562                         | Cdh24       |
| 17736736              | 8.23                               | 8.14                                | 1.07                                      | 0.0976108          | 0.014993                           | 0.999562                         | Myo10       |
| 17657398              | 7.44                               | 7.68                                | -1.18                                     | -0.238787          | 0.025488                           | 0.999562                         | Ntn1        |
| 17662478              | 5.11                               | 5.4                                 | -1.22                                     | -0.286881          | 0.046112                           | 0.999562                         | Icam2       |
| 17779108              | 6                                  | 5.83                                | 1.13                                      | 0.1763228          | 0.050883                           | 0.999562                         | Ada         |
| 17630418              | 6.55                               | 6.28                                | 1.2                                       | 0.2630344          | 0.054165                           | 0.999562                         | PVR         |
| 17849247              | 4.13                               | 3.99                                | 1.1                                       | 0.1375035          | 0.066859                           | 0.999562                         | Ccr5        |
| 17756618              | 8.05                               | 8.11                                | -1.04                                     | -0.056584          | 0.069545                           | 0.999562                         | Tnxb        |
| 17799844              | 5.12                               | 5.39                                | -1.2                                      | -0.263034          | 0.081691                           | 0.999562                         | Tek         |
| 17777980              | 6.16                               | 5.81                                | 1.27                                      | 0.3448285          | 0.089568                           | 0.999562                         | Cd93        |
| 17732686              | 10.09                              | 10.18                               | -1.06                                     | -0.084064          | 0.093862                           | 0.999562                         | Lphn1       |
| 17711838              | 9.15                               | 9.19                                | -1.03                                     | -0.042644          | 0.095813                           | 0.999562                         | Fat1        |
